# Supplementary material for: Rethinking the Negativity Bias Online: The Heterogeneous Effects of Negative Language on Online News Engagement
Source: Research Square preprint supplement (doi:10.21203/rs.3.rs-7042600/v1), 2025-09-24
Supplement: Supplementary file 1 [file 88b2a947329b5951a3947958.pdf]

# **Appendix A**

## Study Designs

## Study 1 (Individual Differences Moderation Study)

### Design:

Study 1 used a 2 (Negative Tone: High vs. Low)  $\times$  2 (Negative Emotion: High vs. Low) between-subjects design. Each participant saw 3 headlines from one of the four conditions. In this study, we also tested for other exploratory factors like the breadth focus (i.e, how broad of an issue it is) of the topic and also the controversialness of it. The analyses combine across those factors.

### Stimuli (Headlines):

- *High Tone, High Emotion:*
  - Government Betrayal Sparks Nationwide Fury as Corruption Scandal Unfolds
  - Public Outrage Explodes Over Massive Cover-Up in Political Scandal
  - Protests Erupt as Citizens Demand Justice Amid Corruption Allegations
- *Low Tone, High Emotion:*
  - Public Anxiety Mounts Over Economic Policy Impacting Families
  - Growing Fear as New Financial Regulations Spark Uncertainty
  - Citizens Express Deep Concerns Over Job Security Under New Laws
- *High Tone, Low Emotion:*
  - Lawmakers Face Harsh Criticism Over Highly Contested New Policy
  - New Government Law Faces Backlash Amid Mounting Public Discontent
  - Political Divide Deepens as Controversial Bill Gains Momentum
- *Low Tone, Low Emotion:*
  - Debate Continues Over Economic Policy as Citizens Voice Concerns
  - Experts Analyze the Long-Term Impact of Newly Proposed Financial Policies
  - Government Announces Revisions to Economic Policy Following Public Feedback

### Measures and Exact Wording:

- **Likelihood of Reading**

“Please look at the headlines below. For each of them, indicate how likely you are to read the full article associated with it.”

*Scale:* 1 = Very Unlikely to 5 = Very Likely
- **PANAS (Positive and Negative Affect Schedule)**

“This scale consists of a number of words that describe different feelings and emotions. Read each item and then mark the appropriate answer in the space next to that word. Indicate to what extent you feel each particular emotion or feelings today. Use the following scale to record your answers”

*Items:*

  - Interested
  - Distressed
  - Excited
  - Upset
  - Strong
  - Guilty
  - Enthusiastic
  - Irritable
  - Alert
  - Ashamed

*Scale:* 1 = Very slightly or not at all to 5 = Extremely

- **Trait Neuroticism**

“Here are a few personality traits that may or may not apply to you. Please indicate the extent to which you agree or disagree with that statement. You should rate the extent to which the pair of traits applies to you, even if one characteristic applies more strongly than the other.”

*Items:*

- I am anxious, and easily get upset
- I am calm, and emotionally stable

*Scale:* 1 = Strongly disagree to 5 = Strongly agree

- **Lay Rationalism**

“Indicate your agreement or disagreement with the following statements:”

*Items:*

- When making decisions, I like to analyze financial costs and benefits and resist the influence of my feelings.
- When choosing between two options, one of which makes me feel better and the other better serves the goal I want to achieve, I choose the one that makes me feel better.
- When making decisions, I think about what I want to achieve rather than how I feel.
- When choosing between two options, one of which is financially superior and the other "feels" better to me, I choose the one that is financially better.
- When choosing between products, I rely on my gut feelings rather than on product specifications (numbers and objective descriptions) (*reverse coded*).
- When making decisions, I focus on objective facts rather than subjective feelings.

*Scale:* 1 = Strongly disagree to 5 = Strongly agree

## Study 2 (Reader Goals × Negative Language)

### Design:

Participants (N = 1,790) were randomly assigned to one of four between-subjects conditions:

1. Manipulated site label:

- **Credibility:** Imagine you're browsing the internet, scrolling through various news websites.

As you click through, you come across a site you recognize—one that you know delivers trustworthy and credible news. It's a source you've relied on in the past, and you trust what you read there.

Over the next few pages, you'll see a set of headlines - imagine that they are from the credible and trustworthy news website, as mentioned above. As you go through them, imagine you're reading them from that familiar, credible context.

- **Enjoyment:** Imagine you're browsing the internet, scrolling through various news websites.

You land on a site that you recognize— not as a source of serious news. Instead, it's a site known for fun and entertaining stories. You don't expect hard-hitting journalism here, but it's enjoyable to read.

Over the next few pages, you'll see a set of headlines - imagine that they are from the fun and enjoyable news website, as mentioned above. As you read them, imagine yourself scrolling through this entertainment-focused context.

2. Manipulated mindset:

- **Credibility:** Imagine you're browsing the internet with a purpose: you want to find credible and trustworthy news. You're looking for facts and reliable reporting. You're carefully scanning websites, seeking out sources you can depend on. In the next few pages, you'll see a few headlines—imagine you're encountering them as part of your

search for credible news. Think about them with this goal in mind, that is, looking for credible and reliable information.

- **Enjoyment:** Imagine you're browsing the internet with a purpose: you want to find entertaining and fun news. You're browsing news websites that have enjoyable stories. You're carefully scanning websites, seeking out sources that can entertain you. In the next few pages, you'll see a few headlines—imagine you're encountering them as part of your search for fun news. Think about them with this goal in mind, that is, seeking the kind of news that is fun to read.

3. Self-selected site preference:

- Imagine you're casually browsing the internet, scrolling through various news websites. Which of the two types of news websites do you think you would be more likely to read articles from? While both may be true for you in general, we'd like to know which type of site you typically lean toward when reading news online.
  - i. A news website that focuses on credible and trustworthy news
    - *Instructions if chosen:* On the last page, you indicated that, while browsing news websites, you typically prefer to find credible, trustworthy news. That is, websites where you want to look for trustworthy and reliable reporting. Imagine that you're carefully scanning websites, seeking out sources you can depend on. In the next few pages, you'll see a few headlines—imagine you're encountering them as part of your search for credible news. Think about them with this preference in mind, that is, looking for the kind of sites where content is credible and reliable.
  - ii. A news website that focuses on fun and entertaining news
    - *Instructions if chosen:* On the last page, you indicated that, while browsing news websites, you typically prefer to find news that would entertain you. That is, websites where you want to look for fun and entertaining stories. Imagine that you're carefully scanning websites, seeking out sources that can entertain you. In the next few pages, you'll see a few headlines—imagine you're encountering them as part of your search for fun news. Think about them with this preference in mind, that is, looking for the kind of sites where content is fun to read.

4. Self-selected mindset:

- Imagine you're casually browsing the internet, scrolling through various news websites. Which of the two mindsets do you think best reflects how you typically approach reading news online? While both may be true for you in general, we'd like to know which mindset you typically lean toward when reading news online.
  - i. Credibility-focused - I typically look for credible, trustworthy content.
    - *Instructions if chosen:* On the last page, you indicated that, while browsing news websites, you typically are in a credibility-focused mindset. That is, you typically look for accurate, trustworthy content. Imagine that you're carefully scanning websites, seeking out sources you can depend on. In the next few pages, you'll see a few headlines—imagine you're encountering them as part of your search for credible

news. Think about them with this goal in mind, that is, seeking out credible and reliable information.

- ii. Enjoyment-focused - I typically look for entertaining, fun content.
  - *Instructions if chosen:* On the last page, you indicated that, while browsing news websites, you typically are in an enjoyment-focused mindset. That is, you typically look for entertaining, fun content. Imagine that you're carefully scanning websites, seeking out sources you can depend on. In the next few pages, you'll see a few headlines—imagine you're encountering them as part of your search for fun news. Think about them with this goal in mind, that is, seeking out entertaining and fun information.

Each participant saw 8 headlines, sampled from two topics per participant. There were a total of 16 headlines, so participants saw one of two sets of 8 headlines. Headlines varied in Negative Tone (High vs. Low) and Negative Emotion (High vs. Low). Political and local topics were also included. In this study we also tested for constructs under Fluency, which we do not use for the analyses.

### **Stimuli (Headlines):**

#### Set 1

- *High Tone, High Emotion*
  - Congress Reeks of Chaos and Contempt as Budget Scrapes By Amid Rage
  - Frustration Grows Over Local Library's Underwhelming Summer Initiative
- *Low Tone, High Emotion:*
  - Tense and Emotional Vote Leaves Lawmakers Exhausted as Budget Passes
  - Parents Express Frustration Over Accessibility of Local Library's Reading Program
- *High Tone, Low Emotion:*
  - Lawmakers Brawl in Another Dysfunctional Display as Budget Squeezes Through Congress
  - Library Struggles to Attract Attention with New Kids' Reading Program
- *Low Tone, Low Emotion:*
  - Congress Passes Budget in Close Vote After Intense Discussions
  - Local Library Starts Free Summer Reading Program for Local Kids

#### Set 2

- *High Tone, High Emotion*
  - Tensions Explode as City Pushes Divisive Policing Reform
  - Critics Slam NASA's Reckless Mars Plan Amid Public Anxiety
- *Low Tone, High Emotion:*
  - Stress and Tension Run High as City Council Votes on Policing Changes
  - Anxiety Stirs as Americans React to Risky Mars Mission
- *High Tone, Low Emotion:*
  - City Council Forces Through Policing Reform Despite Local Backlash
  - NASA's Costly Mars Gamble Raises Eyebrows Across Nation
- *Low Tone, Low Emotion:*
  - City Council Approves New Policing Measures After Deliberation
  - NASA Details Upcoming 2028 Mission to Mars in Public Briefing

### **Measures and Exact Wording:**

- **Likelihood of Reading**

“Please look at the headlines below. For each of them, indicate how likely you are to read the full article associated with it.”

*Scale: 1 = Very Unlikely to 5 = Very Likely*

### **Study 3 (Adding Manipulative Intent Ratings)**

**Design:**

Same as Study 2, except:

- The manipulated site condition was replaced with a neutral control (no site framing):
  - Imagine you're browsing the internet and come across some headlines. In the next few pages, take a look at each one and think about how you might respond if you saw it while scrolling online.
- Participants rated each headline on **perceived manipulative intent (IMI)**:

**Stimuli:**

Identical to Study 3.

**Measures and Exact Wording:**

- **Likelihood of Reading**

“Please look at the headlines below. For each of them, indicate how likely you are to read the full article associated with it.”

*Scale: 1 = Very Unlikely to 5 = Very Likely*

- **Perceived Manipulative Intent (IMI)**

“For each of the headlines below, please indicate your agreement with the following statement:”

*Items:*

- The headline is trying to manipulate the audience in inappropriate ways
- The headline is trying to be manipulative
- The headline is attempting to unfairly persuade the audience
- The headline seems like a trick to get people to click
- The headline is being too pushy
- The headline is trying to unfairly influence readers

*Scale: 1 = Completely Disagree to 5 = Completely Agree*

### **Study 4 (Important Topics)**

**Design:**

Conditions were identical to Study 3. Participants saw 8 headlines (4 per topic), fully crossing Negative Tone (High vs. Low) × Negative Emotion (High vs. Low), for two pre-tested topics:

1. Vaccine Safety and Public Health
2. Mental Health Awareness

**Stimuli:**

- *Vaccine Safety*

- High Tone, High Emotion: “Kennedy injects fear and anxiety into CDC by appointing dangerous anti-vaccine extremists”

- High Tone, Low Emotion: “Kennedy sparks backlash after replacing CDC members with controversial anti-vaccine figures”
- Low Tone, High Emotion: “Emerging anxiety over CDC panel changes involving concerning anti-vaccine ideologies”
- Low Tone, Low Emotion: “Kennedy replaces fired US CDC panel members, includes anti-vaccine proponents”
- *Mental Health Awareness*
  - High Tone, High Emotion: “U.S. colleges overwhelmed as mental health crisis triggers fear and despair among students”
  - High Tone, Low Emotion: “Colleges neglect mounting mental health crisis despite rising diagnoses”
  - Low Tone, High Emotion: “Rising student diagnoses spark deep concern and emotional distress on U.S. campuses”
  - Low Tone, Low Emotion: “Mental health diagnoses rising among U.S. college students”

### Measures and Exact Wording:

- **Likelihood of Reading**  
 “Please look at the headlines below. For each of them, indicate how likely you are to read the full article associated with it.”  
*Scale: 1 = Very Unlikely to 5 = Very Likely*

### Study 5 (Affective Polarization)

Study 6 employed a **2 (Negative Tone: High vs. Low) × 2 (Negative Emotion: High vs. Low)** between-subjects design. Each participant saw two Pro-Democratic and two Pro-Republican headlines, all drawn from the same tone–emotion combination. This allowed for within-subject comparisons across political alignment, while holding linguistic features constant between subjects.

This study only used the measured mindset condition. The experiment was run in two matched batches: the first included only Democrats, and the second included only Republicans. Materials and procedures were identical across samples, and the data were combined for analysis.

The order of headline blocks (Pro-Democratic vs. Pro-Republican first) was counterbalanced. Participants rated how likely they were to read each headline, and then completed a feeling thermometer after each topic block to report their current affect toward Democrats or Republicans.

### Stimuli (Headlines)

Each participant saw two headlines from each topic. The exact wording varied depending on their assigned tone and emotion condition.

#### Pro-Democratic Headlines (Topic: Trans Rights / Workplace Raids)

- **High Tone, High Emotion:**
  - *Devastated McBride slams the Left’s neglect and abandonment of trans people in a crushing failure*
  - *Outraged Democrats condemn ICE’s gutting of hard-won workplace protections as alarming and reckless*
- **High Tone, Low Emotion:**

- *McBride blames strategic failures and exposes negligence in the Left's handling of trans rights*
- *ICE dismantles protections and greenlights aggressive workplace raids*
- **Low Tone, High Emotion:**
  - *McBride calls the rollback of trans rights heartbreaking and deeply distressing*
  - *Democrats express deep concern and dismay over ICE's reversal of workplace protections*
- **Low Tone, Low Emotion:**
  - *Sarah McBride on why the Left lost on trans rights*
  - *ICE walks back limits on raids targeting farms, restaurants and hotels*

### **Pro-Republican Headlines (Topic: Immigration / Trans Military Service)**

- **High Tone, High Emotion:**
  - *Outraged conservatives hail CBP's forceful response and reversal of disastrous, infuriating open-border failures*
  - *Outraged and disgusted, Republicans slam Democrats' reckless push to reinstate transgender troops despite readiness concerns*
- **High Tone, Low Emotion:**
  - *CBP obliterates reckless Biden-era loopholes, ending chaotic border releases*
  - *Democrats push a radical bill that would undermine military standards by reinstating transgender service*
- **Low Tone, High Emotion:**
  - *Conservatives voice anger and frustration over years of border neglect despite new CBP success*
  - *Republicans express alarm and frustration over efforts to restore transgender military access*
- **Low Tone, Low Emotion:**
  - *Zero illegal aliens released into U.S. in May by Customs and Border Protection*
  - *Senate Democrats file bill to stop ban on transgender military service*

### **Measures and Question Wording**

- **Likelihood of Reading**  
 "Please look at the headlines below. For each of them, indicate how likely you are to read the full article associated with it."  
 Scale: 1 = Very Unlikely to 5 = Very Likely

### **Feeling Thermometers**

After each topic block:

*"After reading the headlines, how warmly or coldly do you feel toward the [Democrats/Republicans] at this moment (regardless of how you feel about them in general)?"*



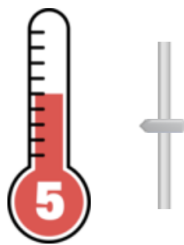

*Scale:* 0 = Very cold or unfavorable, 10 = Very warm or favorable

## **Appendix B**

Supplemental Statistical Materials

## Field Data

### Model for: Positive Tone

Linear mixed model fit by maximum likelihood . t-tests use Satterthwaite's method  
['lmerModLmerTest']

Formula: formula

Data: data

| AIC        | BIC        | logLik   | deviance   | df.resid |
|------------|------------|----------|------------|----------|
| -1658717.6 | -1657964.0 | 829427.8 | -1658855.6 | 408974   |

Scaled residuals:

| Min     | 1Q     | Median | 3Q    | Max    |
|---------|--------|--------|-------|--------|
| -74.329 | -0.105 | -0.001 | 0.097 | 86.742 |

Random effects:

| Groups  | Name        | Variance | Std.Dev. | Corr |
|---------|-------------|----------|----------|------|
| host_id | (Intercept) | 0.000000 | 0.00000  |      |
|         | pos_tone    | 0.000000 | 0.00000  | NaN  |
|         | Residual    | 0.001015 | 0.03185  |      |

Number of obs: 409043, groups: host\_id, 389

Positive Tone Highlighted

Fixed effects:

|                  | Estimate   | Std. Error | df        | t value | Pr(> t ) |     |
|------------------|------------|------------|-----------|---------|----------|-----|
| (Intercept)      | -1.807e-06 | 4.980e-05  | 4.090e+05 | -0.036  | 0.971058 |     |
| pos_tone         | -1.870e-04 | 6.083e-05  | 4.090e+05 | -3.074  | 0.002110 | **  |
| reading_ease     | 4.597e-04  | 7.057e-05  | 4.090e+05 | 6.514   | 7.34e-11 | *** |
| common_words     | 1.690e-04  | 9.499e-05  | 4.090e+05 | 1.780   | 0.075148 | .   |
| numeric          | 6.108e-05  | 5.328e-05  | 4.090e+05 | 1.146   | 0.251644 |     |
| concrete         | 8.827e-05  | 9.220e-05  | 4.090e+05 | 0.957   | 0.338366 |     |
| swearing         | 6.049e-05  | 5.096e-05  | 4.090e+05 | 1.187   | 0.235251 |     |
| informality      | 1.041e-04  | 8.124e-05  | 4.090e+05 | 1.282   | 0.199900 |     |
| deliberation     | -2.769e-05 | 7.174e-05  | 4.090e+05 | -0.386  | 0.699512 |     |
| hedge            | -1.571e-05 | 5.116e-05  | 4.090e+05 | -0.307  | 0.758819 |     |
| negation         | -1.028e-04 | 5.351e-05  | 4.090e+05 | -1.920  | 0.054831 | .   |
| compare_contrast | 1.602e-04  | 9.565e-05  | 4.090e+05 | 1.675   | 0.093918 | .   |
| conflict         | -6.473e-05 | 7.259e-05  | 4.090e+05 | -0.892  | 0.372566 |     |
| location         | -4.536e-05 | 7.809e-05  | 4.090e+05 | -0.581  | 0.561339 |     |
| present          | 1.601e-04  | 6.236e-05  | 4.090e+05 | 2.567   | 0.010256 | *   |
| past             | 1.799e-04  | 5.467e-05  | 4.090e+05 | 3.292   | 0.000996 | *** |
| future           | 4.116e-06  | 5.365e-05  | 4.090e+05 | 0.077   | 0.938845 |     |
| time_related     | -3.934e-05 | 5.368e-05  | 4.090e+05 | -0.733  | 0.463599 |     |
| questions        | -1.663e-04 | 7.276e-05  | 4.090e+05 | -2.286  | 0.022280 | *   |
| secret           | 8.769e-05  | 5.075e-05  | 4.090e+05 | 1.728   | 0.083987 | .   |
| curious          | -1.708e-04 | 8.503e-05  | 4.090e+05 | -2.009  | 0.044565 | *   |
| instructional    | 5.918e-05  | 6.769e-05  | 4.090e+05 | 0.874   | 0.382006 |     |
| second_person    | -4.166e-06 | 5.305e-05  | 4.090e+05 | -0.079  | 0.937403 |     |
| women            | 7.032e-05  | 5.420e-05  | 4.090e+05 | 1.297   | 0.194476 |     |
| men              | 5.536e-05  | 5.313e-05  | 4.090e+05 | 1.042   | 0.297369 |     |
| social_pl_fam    | -1.505e-05 | 6.677e-05  | 4.090e+05 | -0.225  | 0.821708 |     |
| social_pl_other  | -1.621e-05 | 7.308e-05  | 4.090e+05 | -0.222  | 0.824422 |     |
| authority        | 3.068e-05  | 1.151e-04  | 4.090e+05 | 0.266   | 0.789862 |     |

|                   |            |           |           |        |          |   |
|-------------------|------------|-----------|-----------|--------|----------|---|
| fairness          | -5.878e-05 | 7.169e-05 | 4.090e+05 | -0.820 | 0.412272 |   |
| morality          | -3.310e-05 | 6.953e-05 | 4.090e+05 | -0.476 | 0.634045 |   |
| threat            | 3.266e-06  | 7.574e-05 | 4.090e+05 | 0.043  | 0.965609 |   |
| harm              | -3.947e-05 | 7.391e-05 | 4.090e+05 | -0.534 | 0.593266 |   |
| fearful           | 6.674e-05  | 8.430e-05 | 4.090e+05 | 0.792  | 0.428578 |   |
| safekeeping       | -9.182e-05 | 7.196e-05 | 4.090e+05 | -1.276 | 0.201958 |   |
| goals             | -7.741e-05 | 7.096e-05 | 4.090e+05 | -1.091 | 0.275288 |   |
| desire            | -6.687e-05 | 5.118e-05 | 4.090e+05 | -1.306 | 0.191384 |   |
| aesthetics        | -3.354e-05 | 5.071e-05 | 4.090e+05 | -0.661 | 0.508303 |   |
| visual_language   | 6.407e-05  | 7.132e-05 | 4.090e+05 | 0.898  | 0.368983 |   |
| auditory_lang     | 3.643e-05  | 6.145e-05 | 4.090e+05 | 0.593  | 0.553276 |   |
| cuteness          | -1.286e-05 | 5.084e-05 | 4.090e+05 | -0.253 | 0.800316 |   |
| other_senses      | -1.036e-04 | 5.057e-05 | 4.090e+05 | -2.048 | 0.040574 | * |
| neg_tone          | -3.098e-05 | 7.433e-05 | 4.090e+05 | -0.417 | 0.676809 |   |
| emotion_intensity | 2.448e-04  | 1.038e-04 | 4.090e+05 | 2.357  | 0.018403 | * |
| pos_emotion       | -7.027e-05 | 9.229e-05 | 4.090e+05 | -0.761 | 0.446422 |   |
| neg_emotion       | 9.290e-05  | 7.637e-05 | 4.090e+05 | 1.216  | 0.223808 |   |
| disgusting        | 6.634e-07  | 7.134e-05 | 4.090e+05 | 0.009  | 0.992581 |   |
| angry             | -2.275e-06 | 8.168e-05 | 4.090e+05 | -0.028 | 0.977782 |   |
| action_words      | 6.090e-05  | 5.253e-05 | 4.090e+05 | 1.159  | 0.246346 |   |
| verb_categories   | 2.595e-04  | 1.047e-04 | 4.090e+05 | 2.478  | 0.013220 | * |
| conjunction       | 3.900e-05  | 5.479e-05 | 4.090e+05 | 0.712  | 0.476505 |   |
| physical_health   | -1.160e-04 | 6.105e-05 | 4.090e+05 | -1.900 | 0.057410 | . |
| mental_health     | -5.006e-05 | 5.078e-05 | 4.090e+05 | -0.986 | 0.324207 |   |
| drugs             | -1.579e-05 | 5.075e-05 | 4.090e+05 | -0.311 | 0.755787 |   |
| financial         | -1.709e-04 | 8.524e-05 | 4.090e+05 | -2.006 | 0.044901 | * |
| sex               | 1.259e-04  | 7.248e-05 | 4.090e+05 | 1.738  | 0.082264 | . |
| religion          | -2.379e-05 | 6.392e-05 | 4.090e+05 | -0.372 | 0.709710 |   |
| famous            | 1.299e-06  | 5.024e-05 | 4.090e+05 | 0.026  | 0.979367 |   |

|                      |            |           |           |        |          |   |
|----------------------|------------|-----------|-----------|--------|----------|---|
| government_crime_std | -1.140e-04 | 5.562e-05 | 4.090e+05 | -2.050 | 0.040325 | * |
| entertainment_std    | -1.404e-05 | 5.299e-05 | 4.090e+05 | -0.265 | 0.791079 |   |
| business_std         | 1.282e-06  | 5.255e-05 | 4.090e+05 | 0.024  | 0.980543 |   |
| education_std        | 6.487e-05  | 5.153e-05 | 4.090e+05 | 1.259  | 0.208059 |   |
| news_std             | 5.740e-05  | 5.058e-05 | 4.090e+05 | 1.135  | 0.256429 |   |
| identity_std         | 1.565e-05  | 5.082e-05 | 4.090e+05 | 0.308  | 0.758107 |   |
| hobby_std            | 6.095e-05  | 5.453e-05 | 4.090e+05 | 1.118  | 0.263692 |   |
| technology           | -1.083e-04 | 6.242e-05 | 4.090e+05 | -1.736 | 0.082635 | . |

---

Signif. codes: 0 '\*\*\*' 0.001 '\*\*' 0.01 '\*' 0.05 '.' 0.1 ' ' 1

### Model for: Negative Tone

Linear mixed model fit by maximum likelihood . t-tests use Satterthwaite's method  
['lmerModLmerTest']

Formula: formula

Data: data

| AIC        | BIC        | logLik   | deviance   | df.resid |
|------------|------------|----------|------------|----------|
| -1660409.0 | -1659655.5 | 830273.5 | -1660547.0 | 408974   |

Scaled residuals:

| Min     | 1Q     | Median | 3Q    | Max    |
|---------|--------|--------|-------|--------|
| -67.768 | -0.106 | -0.001 | 0.099 | 87.125 |

Random effects:

| Groups  | Name        | Variance  | Std.Dev. | Corr |
|---------|-------------|-----------|----------|------|
| host_id | (Intercept) | 0.0003173 | 0.01781  |      |
|         | neg_tone    | 0.0025213 | 0.05021  | 1.00 |

Residual 0.0010056 0.03171

Number of obs: 409043, groups: host\_id, 389

### Negative Tone Highlighted

Fixed effects:

|                  | Estimate   | Std. Error | df        | t value | Pr(> t ) |     |
|------------------|------------|------------|-----------|---------|----------|-----|
| (Intercept)      | 1.015e-03  | 9.621e-04  | 2.196e+02 | 1.055   | 0.29274  |     |
| neg_tone         | 2.895e-03  | 2.708e-03  | 3.215e+02 | 1.069   | 0.28600  |     |
| reading_ease     | 4.856e-04  | 7.161e-05  | 3.418e+05 | 6.782   | 1.18e-11 | *** |
| common_words     | 1.982e-04  | 9.515e-05  | 3.742e+05 | 2.083   | 0.03723  | *   |
| numeric          | 5.831e-05  | 5.323e-05  | 4.087e+05 | 1.095   | 0.27333  |     |
| concrete         | 8.934e-05  | 9.202e-05  | 4.086e+05 | 0.971   | 0.33162  |     |
| swearing         | 6.984e-05  | 5.088e-05  | 4.087e+05 | 1.373   | 0.16990  |     |
| informality      | 1.165e-04  | 8.115e-05  | 4.088e+05 | 1.436   | 0.15100  |     |
| deliberation     | -3.278e-06 | 7.156e-05  | 4.084e+05 | -0.046  | 0.96346  |     |
| hedge            | -1.534e-05 | 5.096e-05  | 4.087e+05 | -0.301  | 0.76343  |     |
| negation         | -1.035e-04 | 5.332e-05  | 4.087e+05 | -1.941  | 0.05231  | .   |
| compare_contrast | 1.703e-04  | 9.539e-05  | 4.086e+05 | 1.785   | 0.07428  | .   |
| conflict         | -7.161e-05 | 7.259e-05  | 4.086e+05 | -0.986  | 0.32389  |     |
| location         | -3.975e-05 | 7.801e-05  | 4.083e+05 | -0.510  | 0.61037  |     |
| present          | 1.676e-04  | 6.216e-05  | 4.087e+05 | 2.696   | 0.00701  | **  |
| past             | 1.781e-04  | 5.450e-05  | 4.087e+05 | 3.268   | 0.00108  | **  |
| future           | 5.133e-06  | 5.345e-05  | 4.086e+05 | 0.096   | 0.92349  |     |
| time_related     | -3.539e-05 | 5.351e-05  | 4.087e+05 | -0.661  | 0.50841  |     |
| questions        | -1.752e-04 | 7.255e-05  | 4.087e+05 | -2.416  | 0.01571  | *   |
| secret           | 9.010e-05  | 5.055e-05  | 4.087e+05 | 1.783   | 0.07467  | .   |
| curious          | -1.609e-04 | 8.483e-05  | 4.083e+05 | -1.896  | 0.05791  | .   |
| instructional    | 5.701e-05  | 6.741e-05  | 4.086e+05 | 0.846   | 0.39767  |     |
| second_person    | -9.754e-06 | 5.284e-05  | 4.087e+05 | -0.185  | 0.85356  |     |
| women            | 6.791e-05  | 5.417e-05  | 4.085e+05 | 1.254   | 0.20992  |     |

|                   |            |           |           |        |         |    |
|-------------------|------------|-----------|-----------|--------|---------|----|
| men               | 5.052e-05  | 5.316e-05 | 4.078e+05 | 0.950  | 0.34195 |    |
| social_pl_fam     | -1.062e-05 | 6.658e-05 | 4.087e+05 | -0.160 | 0.87322 |    |
| social_pl_other   | -2.129e-05 | 7.280e-05 | 4.087e+05 | -0.292 | 0.76990 |    |
| authority         | 6.686e-05  | 1.150e-04 | 4.026e+05 | 0.581  | 0.56112 |    |
| fairness          | -5.936e-05 | 7.144e-05 | 4.086e+05 | -0.831 | 0.40604 |    |
| morality          | -3.009e-05 | 6.947e-05 | 4.086e+05 | -0.433 | 0.66496 |    |
| threat            | -2.514e-05 | 7.604e-05 | 4.086e+05 | -0.331 | 0.74094 |    |
| harm              | -5.908e-05 | 7.517e-05 | 4.076e+05 | -0.786 | 0.43190 |    |
| fearful           | 7.477e-05  | 8.423e-05 | 4.087e+05 | 0.888  | 0.37473 |    |
| safekeeping       | -8.331e-05 | 7.170e-05 | 4.087e+05 | -1.162 | 0.24527 |    |
| goals             | -7.558e-05 | 7.071e-05 | 4.087e+05 | -1.069 | 0.28516 |    |
| desire            | -6.582e-05 | 5.099e-05 | 4.087e+05 | -1.291 | 0.19672 |    |
| aesthetics        | -3.675e-05 | 5.054e-05 | 4.087e+05 | -0.727 | 0.46709 |    |
| visual_language   | 6.660e-05  | 7.106e-05 | 4.087e+05 | 0.937  | 0.34865 |    |
| auditory_lang     | 4.072e-05  | 6.124e-05 | 4.087e+05 | 0.665  | 0.50611 |    |
| cuteness          | -1.517e-05 | 5.066e-05 | 4.087e+05 | -0.299 | 0.76463 |    |
| other_senses      | -1.029e-04 | 5.044e-05 | 4.087e+05 | -2.041 | 0.04128 | *  |
| pos_tone          | -1.870e-04 | 6.062e-05 | 4.087e+05 | -3.085 | 0.00203 | ** |
| emotion_intensity | 2.469e-04  | 1.037e-04 | 4.086e+05 | 2.380  | 0.01732 | *  |
| pos_emotion       | -7.846e-05 | 9.198e-05 | 4.084e+05 | -0.853 | 0.39368 |    |
| neg_emotion       | 1.099e-04  | 7.692e-05 | 4.085e+05 | 1.429  | 0.15296 |    |
| disgusting        | 1.813e-05  | 7.129e-05 | 4.087e+05 | 0.254  | 0.79927 |    |
| angry             | -3.763e-05 | 8.163e-05 | 4.087e+05 | -0.461 | 0.64482 |    |
| action_words      | 6.413e-05  | 5.237e-05 | 4.087e+05 | 1.225  | 0.22074 |    |
| verb_categories   | 2.531e-04  | 1.044e-04 | 4.086e+05 | 2.425  | 0.01532 | *  |
| conjunction       | 3.776e-05  | 5.471e-05 | 4.079e+05 | 0.690  | 0.49003 |    |
| physical_health   | -1.192e-04 | 6.093e-05 | 4.087e+05 | -1.956 | 0.05045 | .  |
| mental_health     | -4.716e-05 | 5.061e-05 | 4.086e+05 | -0.932 | 0.35146 |    |
| drugs             | -1.870e-05 | 5.059e-05 | 4.088e+05 | -0.370 | 0.71167 |    |

|                      |            |           |           |        |         |   |
|----------------------|------------|-----------|-----------|--------|---------|---|
| financial            | -1.656e-04 | 8.495e-05 | 4.087e+05 | -1.950 | 0.05120 | . |
| sex                  | 1.052e-04  | 7.242e-05 | 4.087e+05 | 1.453  | 0.14631 |   |
| religion             | -2.506e-05 | 6.373e-05 | 4.087e+05 | -0.393 | 0.69418 |   |
| famous               | 1.456e-06  | 5.004e-05 | 4.086e+05 | 0.029  | 0.97679 |   |
| government_crime_std | -1.226e-04 | 5.578e-05 | 4.036e+05 | -2.198 | 0.02798 | * |
| entertainment_std    | -1.278e-05 | 5.286e-05 | 4.087e+05 | -0.242 | 0.80889 |   |
| business_std         | 3.586e-06  | 5.245e-05 | 4.050e+05 | 0.068  | 0.94549 |   |
| education_std        | 5.088e-05  | 5.134e-05 | 4.087e+05 | 0.991  | 0.32168 |   |
| news_std             | 5.745e-05  | 5.039e-05 | 4.087e+05 | 1.140  | 0.25416 |   |
| identity_std         | 1.577e-05  | 5.079e-05 | 4.074e+05 | 0.311  | 0.75615 |   |
| hobby_std            | 6.393e-05  | 5.435e-05 | 4.087e+05 | 1.176  | 0.23952 |   |
| technology           | -1.090e-04 | 6.224e-05 | 4.085e+05 | -1.752 | 0.07982 | . |

---

Signif. codes: 0 '\*\*\*' 0.001 '\*\*' 0.01 '\*' 0.05 '.' 0.1 ' ' 1

=====

## Model for: Intensity of Emotion

=====

Linear mixed model fit by maximum likelihood . t-tests use Satterthwaite's method  
['lmerModLmerTest']

Formula: formula

Data: data

| AIC        | BIC        | logLik   | deviance   | df.resid |
|------------|------------|----------|------------|----------|
| -1658717.6 | -1657964.0 | 829427.8 | -1658855.6 | 408974   |



Scaled residuals:

| Min     | 1Q     | Median | 3Q    | Max    |
|---------|--------|--------|-------|--------|
| -74.329 | -0.105 | -0.001 | 0.097 | 86.742 |

Random effects:

| Groups   | Name              | Variance  | Std.Dev.  | Corr |
|----------|-------------------|-----------|-----------|------|
| host_id  | (Intercept)       | 0.000e+00 | 0.000e+00 |      |
|          | emotion_intensity | 9.554e-16 | 3.091e-08 | NaN  |
| Residual |                   | 1.015e-03 | 3.185e-02 |      |

Number of obs: 409043, groups: host\_id, 389

### Intensity of Emotion Highlighted

Fixed effects:

|                   | Estimate   | Std. Error | df        | t value | Pr(> t )     |
|-------------------|------------|------------|-----------|---------|--------------|
| (Intercept)       | -1.807e-06 | 4.980e-05  | 4.090e+05 | -0.036  | 0.971058     |
| emotion_intensity | 2.448e-04  | 1.038e-04  | 4.089e+05 | 2.357   | 0.018403 *   |
| reading_ease      | 4.597e-04  | 7.057e-05  | 4.090e+05 | 6.514   | 7.34e-11 *** |
| common_words      | 1.690e-04  | 9.499e-05  | 4.090e+05 | 1.780   | 0.075148 .   |
| numeric           | 6.108e-05  | 5.328e-05  | 4.090e+05 | 1.146   | 0.251644     |
| concrete          | 8.827e-05  | 9.220e-05  | 4.090e+05 | 0.957   | 0.338366     |
| swearing          | 6.049e-05  | 5.096e-05  | 4.090e+05 | 1.187   | 0.235251     |
| informality       | 1.041e-04  | 8.124e-05  | 4.090e+05 | 1.282   | 0.199900     |
| deliberation      | -2.769e-05 | 7.174e-05  | 4.090e+05 | -0.386  | 0.699512     |
| hedge             | -1.571e-05 | 5.116e-05  | 4.090e+05 | -0.307  | 0.758819     |
| negation          | -1.028e-04 | 5.351e-05  | 4.090e+05 | -1.920  | 0.054831 .   |
| compare_contrast  | 1.602e-04  | 9.565e-05  | 4.090e+05 | 1.675   | 0.093918 .   |
| conflict          | -6.473e-05 | 7.259e-05  | 4.090e+05 | -0.892  | 0.372566     |
| location          | -4.536e-05 | 7.809e-05  | 4.090e+05 | -0.581  | 0.561339     |
| present           | 1.601e-04  | 6.236e-05  | 4.090e+05 | 2.567   | 0.010256 *   |

|                 |            |           |           |        |          |     |
|-----------------|------------|-----------|-----------|--------|----------|-----|
| past            | 1.799e-04  | 5.467e-05 | 4.090e+05 | 3.292  | 0.000996 | *** |
| future          | 4.116e-06  | 5.365e-05 | 4.090e+05 | 0.077  | 0.938845 |     |
| time_related    | -3.934e-05 | 5.368e-05 | 4.090e+05 | -0.733 | 0.463599 |     |
| questions       | -1.663e-04 | 7.276e-05 | 4.090e+05 | -2.286 | 0.022280 | *   |
| secret          | 8.769e-05  | 5.075e-05 | 4.090e+05 | 1.728  | 0.083987 | .   |
| curious         | -1.708e-04 | 8.503e-05 | 4.090e+05 | -2.009 | 0.044565 | *   |
| instructional   | 5.918e-05  | 6.769e-05 | 4.090e+05 | 0.874  | 0.382006 |     |
| second_person   | -4.166e-06 | 5.305e-05 | 4.090e+05 | -0.079 | 0.937403 |     |
| women           | 7.032e-05  | 5.420e-05 | 4.090e+05 | 1.297  | 0.194476 |     |
| men             | 5.536e-05  | 5.313e-05 | 4.090e+05 | 1.042  | 0.297369 |     |
| social_pl_fam   | -1.505e-05 | 6.677e-05 | 4.090e+05 | -0.225 | 0.821708 |     |
| social_pl_other | -1.621e-05 | 7.308e-05 | 4.090e+05 | -0.222 | 0.824422 |     |
| authority       | 3.068e-05  | 1.151e-04 | 4.090e+05 | 0.266  | 0.789862 |     |
| fairness        | -5.878e-05 | 7.169e-05 | 4.090e+05 | -0.820 | 0.412272 |     |
| morality        | -3.310e-05 | 6.953e-05 | 4.090e+05 | -0.476 | 0.634045 |     |
| threat          | 3.266e-06  | 7.574e-05 | 4.090e+05 | 0.043  | 0.965609 |     |
| harm            | -3.947e-05 | 7.391e-05 | 4.090e+05 | -0.534 | 0.593266 |     |
| fearful         | 6.674e-05  | 8.430e-05 | 4.090e+05 | 0.792  | 0.428578 |     |
| safekeeping     | -9.182e-05 | 7.196e-05 | 4.090e+05 | -1.276 | 0.201958 |     |
| goals           | -7.741e-05 | 7.096e-05 | 4.090e+05 | -1.091 | 0.275288 |     |
| desire          | -6.687e-05 | 5.118e-05 | 4.090e+05 | -1.306 | 0.191384 |     |
| aesthetics      | -3.354e-05 | 5.071e-05 | 4.090e+05 | -0.661 | 0.508303 |     |
| visual_language | 6.407e-05  | 7.132e-05 | 4.090e+05 | 0.898  | 0.368983 |     |
| auditory_lang   | 3.643e-05  | 6.145e-05 | 4.090e+05 | 0.593  | 0.553276 |     |
| cuteness        | -1.286e-05 | 5.084e-05 | 4.090e+05 | -0.253 | 0.800316 |     |
| other_senses    | -1.036e-04 | 5.057e-05 | 4.090e+05 | -2.048 | 0.040574 | *   |
| pos_tone        | -1.870e-04 | 6.083e-05 | 4.090e+05 | -3.074 | 0.002110 | **  |
| neg_tone        | -3.098e-05 | 7.433e-05 | 4.090e+05 | -0.417 | 0.676809 |     |
| pos_emotion     | -7.027e-05 | 9.229e-05 | 4.090e+05 | -0.761 | 0.446422 |     |

|                      |            |           |           |        |          |   |
|----------------------|------------|-----------|-----------|--------|----------|---|
| neg_emotion          | 9.290e-05  | 7.637e-05 | 4.090e+05 | 1.216  | 0.223808 |   |
| disgusting           | 6.634e-07  | 7.134e-05 | 4.090e+05 | 0.009  | 0.992580 |   |
| angry                | -2.275e-06 | 8.168e-05 | 4.090e+05 | -0.028 | 0.977782 |   |
| action_words         | 6.090e-05  | 5.253e-05 | 4.090e+05 | 1.159  | 0.246346 |   |
| verb_categories      | 2.595e-04  | 1.047e-04 | 4.090e+05 | 2.478  | 0.013220 | * |
| conjunction          | 3.900e-05  | 5.479e-05 | 4.090e+05 | 0.712  | 0.476505 |   |
| physical_health      | -1.160e-04 | 6.105e-05 | 4.090e+05 | -1.900 | 0.057410 | . |
| mental_health        | -5.006e-05 | 5.078e-05 | 4.090e+05 | -0.986 | 0.324207 |   |
| drugs                | -1.579e-05 | 5.075e-05 | 4.090e+05 | -0.311 | 0.755787 |   |
| financial            | -1.709e-04 | 8.524e-05 | 4.090e+05 | -2.006 | 0.044901 | * |
| sex                  | 1.259e-04  | 7.248e-05 | 4.090e+05 | 1.738  | 0.082264 | . |
| religion             | -2.379e-05 | 6.392e-05 | 4.090e+05 | -0.372 | 0.709710 |   |
| famous               | 1.299e-06  | 5.024e-05 | 4.090e+05 | 0.026  | 0.979367 |   |
| government_crime_std | -1.140e-04 | 5.562e-05 | 4.090e+05 | -2.050 | 0.040325 | * |
| entertainment_std    | -1.404e-05 | 5.299e-05 | 4.090e+05 | -0.265 | 0.791079 |   |
| business_std         | 1.282e-06  | 5.255e-05 | 4.090e+05 | 0.024  | 0.980543 |   |
| education_std        | 6.487e-05  | 5.153e-05 | 4.090e+05 | 1.259  | 0.208059 |   |
| news_std             | 5.740e-05  | 5.058e-05 | 4.090e+05 | 1.135  | 0.256429 |   |
| identity_std         | 1.565e-05  | 5.082e-05 | 4.090e+05 | 0.308  | 0.758107 |   |
| hobby_std            | 6.095e-05  | 5.453e-05 | 4.090e+05 | 1.118  | 0.263692 |   |
| technology           | -1.083e-04 | 6.242e-05 | 4.090e+05 | -1.736 | 0.082635 | . |

---

### Model for: Positive Emotion

Linear mixed model fit by maximum likelihood . t-tests use Satterthwaite's method  
 ['lmerModLmerTest']

Formula: formula

Data: data

| AIC        | BIC        | logLik   | deviance   | df.resid |
|------------|------------|----------|------------|----------|
| -1658717.6 | -1657964.0 | 829427.8 | -1658855.6 | 408974   |

Scaled residuals:

| Min     | 1Q     | Median | 3Q    | Max    |
|---------|--------|--------|-------|--------|
| -74.329 | -0.105 | -0.001 | 0.097 | 86.742 |

Random effects:

| Groups   | Name        | Variance  | Std.Dev.  | Corr |
|----------|-------------|-----------|-----------|------|
| host_id  | (Intercept) | 0.000e+00 | 0.000e+00 |      |
|          | pos_emotion | 1.837e-13 | 4.286e-07 | NaN  |
| Residual |             | 1.015e-03 | 3.185e-02 |      |

Number of obs: 409043, groups: host\_id, 389

Positive Emotion Highlighted

Fixed effects:

|                  | Estimate   | Std. Error | df        | t value | Pr(> t )     |
|------------------|------------|------------|-----------|---------|--------------|
| (Intercept)      | -1.807e-06 | 4.980e-05  | 4.090e+05 | -0.036  | 0.971058     |
| pos_emotion      | -7.027e-05 | 9.229e-05  | 3.952e+05 | -0.761  | 0.446422     |
| reading_ease     | 4.597e-04  | 7.057e-05  | 4.090e+05 | 6.514   | 7.34e-11 *** |
| common_words     | 1.690e-04  | 9.499e-05  | 4.090e+05 | 1.780   | 0.075148 .   |
| numeric          | 6.108e-05  | 5.328e-05  | 4.090e+05 | 1.146   | 0.251644     |
| concrete         | 8.827e-05  | 9.220e-05  | 4.090e+05 | 0.957   | 0.338366     |
| swearing         | 6.049e-05  | 5.096e-05  | 4.090e+05 | 1.187   | 0.235251     |
| informality      | 1.041e-04  | 8.124e-05  | 4.090e+05 | 1.282   | 0.199900     |
| deliberation     | -2.769e-05 | 7.174e-05  | 4.090e+05 | -0.386  | 0.699512     |
| hedge            | -1.571e-05 | 5.116e-05  | 4.090e+05 | -0.307  | 0.758819     |
| negation         | -1.028e-04 | 5.351e-05  | 4.090e+05 | -1.920  | 0.054831 .   |
| compare_contrast | 1.602e-04  | 9.565e-05  | 4.090e+05 | 1.675   | 0.093918 .   |
| conflict         | -6.473e-05 | 7.259e-05  | 4.090e+05 | -0.892  | 0.372566     |

|                 |            |           |           |        |          |     |
|-----------------|------------|-----------|-----------|--------|----------|-----|
| location        | -4.536e-05 | 7.809e-05 | 4.090e+05 | -0.581 | 0.561339 |     |
| present         | 1.601e-04  | 6.236e-05 | 4.090e+05 | 2.567  | 0.010256 | *   |
| past            | 1.799e-04  | 5.467e-05 | 4.090e+05 | 3.292  | 0.000996 | *** |
| future          | 4.116e-06  | 5.365e-05 | 4.090e+05 | 0.077  | 0.938845 |     |
| time_related    | -3.934e-05 | 5.368e-05 | 4.090e+05 | -0.733 | 0.463599 |     |
| questions       | -1.663e-04 | 7.276e-05 | 4.090e+05 | -2.286 | 0.022280 | *   |
| secret          | 8.769e-05  | 5.075e-05 | 4.090e+05 | 1.728  | 0.083987 | .   |
| curious         | -1.708e-04 | 8.503e-05 | 4.090e+05 | -2.009 | 0.044565 | *   |
| instructional   | 5.918e-05  | 6.769e-05 | 4.090e+05 | 0.874  | 0.382006 |     |
| second_person   | -4.166e-06 | 5.305e-05 | 4.090e+05 | -0.079 | 0.937403 |     |
| women           | 7.032e-05  | 5.420e-05 | 4.090e+05 | 1.297  | 0.194476 |     |
| men             | 5.536e-05  | 5.313e-05 | 4.090e+05 | 1.042  | 0.297369 |     |
| social_pl_fam   | -1.505e-05 | 6.677e-05 | 4.090e+05 | -0.225 | 0.821708 |     |
| social_pl_other | -1.621e-05 | 7.308e-05 | 4.090e+05 | -0.222 | 0.824422 |     |
| authority       | 3.068e-05  | 1.151e-04 | 4.090e+05 | 0.266  | 0.789862 |     |
| fairness        | -5.878e-05 | 7.169e-05 | 4.090e+05 | -0.820 | 0.412272 |     |
| morality        | -3.310e-05 | 6.953e-05 | 4.090e+05 | -0.476 | 0.634045 |     |
| threat          | 3.266e-06  | 7.574e-05 | 4.090e+05 | 0.043  | 0.965609 |     |
| harm            | -3.947e-05 | 7.391e-05 | 4.090e+05 | -0.534 | 0.593266 |     |
| fearful         | 6.674e-05  | 8.430e-05 | 4.090e+05 | 0.792  | 0.428578 |     |
| safekeeping     | -9.182e-05 | 7.196e-05 | 4.090e+05 | -1.276 | 0.201958 |     |
| goals           | -7.741e-05 | 7.096e-05 | 4.090e+05 | -1.091 | 0.275288 |     |
| desire          | -6.687e-05 | 5.118e-05 | 4.090e+05 | -1.306 | 0.191384 |     |
| aesthetics      | -3.354e-05 | 5.071e-05 | 4.090e+05 | -0.661 | 0.508303 |     |
| visual_language | 6.407e-05  | 7.132e-05 | 4.090e+05 | 0.898  | 0.368983 |     |
| auditory_lang   | 3.643e-05  | 6.145e-05 | 4.090e+05 | 0.593  | 0.553276 |     |
| cuteness        | -1.286e-05 | 5.084e-05 | 4.090e+05 | -0.253 | 0.800316 |     |
| other_senses    | -1.036e-04 | 5.057e-05 | 4.090e+05 | -2.048 | 0.040574 | *   |
| pos_tone        | -1.870e-04 | 6.083e-05 | 4.090e+05 | -3.074 | 0.002110 | **  |

|                      |            |           |           |        |            |
|----------------------|------------|-----------|-----------|--------|------------|
| neg_tone             | -3.098e-05 | 7.433e-05 | 4.090e+05 | -0.417 | 0.676809   |
| emotion_intensity    | 2.448e-04  | 1.038e-04 | 4.090e+05 | 2.357  | 0.018403 * |
| neg_emotion          | 9.290e-05  | 7.637e-05 | 4.090e+05 | 1.216  | 0.223808   |
| disgusting           | 6.634e-07  | 7.134e-05 | 4.090e+05 | 0.009  | 0.992580   |
| angry                | -2.275e-06 | 8.168e-05 | 4.090e+05 | -0.028 | 0.977782   |
| action_words         | 6.090e-05  | 5.253e-05 | 4.090e+05 | 1.159  | 0.246346   |
| verb_categories      | 2.595e-04  | 1.047e-04 | 4.090e+05 | 2.478  | 0.013220 * |
| conjunction          | 3.900e-05  | 5.479e-05 | 4.090e+05 | 0.712  | 0.476505   |
| physical_health      | -1.160e-04 | 6.105e-05 | 4.090e+05 | -1.900 | 0.057410 . |
| mental_health        | -5.006e-05 | 5.078e-05 | 4.090e+05 | -0.986 | 0.324207   |
| drugs                | -1.579e-05 | 5.075e-05 | 4.090e+05 | -0.311 | 0.755787   |
| financial            | -1.709e-04 | 8.524e-05 | 4.090e+05 | -2.006 | 0.044901 * |
| sex                  | 1.259e-04  | 7.248e-05 | 4.090e+05 | 1.738  | 0.082264 . |
| religion             | -2.379e-05 | 6.392e-05 | 4.090e+05 | -0.372 | 0.709710   |
| famous               | 1.299e-06  | 5.024e-05 | 4.090e+05 | 0.026  | 0.979367   |
| government_crime_std | -1.140e-04 | 5.562e-05 | 4.090e+05 | -2.050 | 0.040325 * |
| entertainment_std    | -1.404e-05 | 5.299e-05 | 4.090e+05 | -0.265 | 0.791079   |
| business_std         | 1.282e-06  | 5.255e-05 | 4.090e+05 | 0.024  | 0.980543   |
| education_std        | 6.487e-05  | 5.153e-05 | 4.090e+05 | 1.259  | 0.208059   |
| news_std             | 5.740e-05  | 5.058e-05 | 4.090e+05 | 1.135  | 0.256429   |
| identity_std         | 1.565e-05  | 5.082e-05 | 4.090e+05 | 0.308  | 0.758107   |
| hobby_std            | 6.095e-05  | 5.453e-05 | 4.090e+05 | 1.118  | 0.263692   |
| technology           | -1.083e-04 | 6.242e-05 | 4.090e+05 | -1.736 | 0.082635 . |

---

=====

### Model for: Negative Emotion

=====

Linear mixed model fit by maximum likelihood . t-tests use Satterthwaite's method  
 ['lmerModLmerTest']

Formula: formula

Data: data

| AIC        | BIC        | logLik   | deviance   | df.resid |
|------------|------------|----------|------------|----------|
| -1659551.3 | -1658797.7 | 829844.6 | -1659689.3 | 408974   |

Scaled residuals:

| Min     | 1Q     | Median | 3Q    | Max    |
|---------|--------|--------|-------|--------|
| -67.583 | -0.106 | -0.002 | 0.098 | 87.008 |

Random effects:

| Groups   | Name        | Variance | Std.Dev. | Corr |
|----------|-------------|----------|----------|------|
| host_id  | (Intercept) | 0.000000 | 0.00000  |      |
|          | neg_emotion | 0.004450 | 0.06670  | NaN  |
| Residual |             | 0.001008 | 0.03175  |      |

Number of obs: 409043, groups: host\_id, 389

Negative Emotion Highlighted

Fixed effects:

|              | Estimate   | Std. Error | df        | t value | Pr(> t )     |
|--------------|------------|------------|-----------|---------|--------------|
| (Intercept)  | 9.330e-06  | 5.046e-05  | 3.707e+05 | 0.185   | 0.85332      |
| neg_emotion  | 5.583e-03  | 3.627e-03  | 2.980e+02 | 1.539   | 0.12479      |
| reading_ease | 4.694e-04  | 7.061e-05  | 4.087e+05 | 6.648   | 2.97e-11 *** |
| common_words | 1.820e-04  | 9.609e-05  | 4.084e+05 | 1.894   | 0.05821 .    |
| numeric      | 6.217e-05  | 5.325e-05  | 4.087e+05 | 1.167   | 0.24304      |
| concrete     | 9.264e-05  | 9.246e-05  | 4.087e+05 | 1.002   | 0.31635      |
| swearing     | 5.851e-05  | 5.086e-05  | 4.087e+05 | 1.150   | 0.24997      |
| informality  | 1.094e-04  | 8.124e-05  | 4.087e+05 | 1.347   | 0.17796      |
| deliberation | -1.145e-05 | 7.166e-05  | 4.087e+05 | -0.160  | 0.87300      |
| hedge        | -1.696e-05 | 5.102e-05  | 4.087e+05 | -0.332  | 0.73959      |
| negation     | -1.036e-04 | 5.340e-05  | 4.086e+05 | -1.940  | 0.05239 .    |

|                  |            |           |           |        |         |    |
|------------------|------------|-----------|-----------|--------|---------|----|
| compare_contrast | 1.637e-04  | 9.555e-05 | 4.087e+05 | 1.713  | 0.08670 | .  |
| conflict         | -5.582e-05 | 7.242e-05 | 4.087e+05 | -0.771 | 0.44082 |    |
| location         | -3.864e-05 | 7.816e-05 | 4.087e+05 | -0.494 | 0.62107 |    |
| present          | 1.622e-04  | 6.222e-05 | 4.087e+05 | 2.607  | 0.00914 | ** |
| past             | 1.766e-04  | 5.456e-05 | 4.087e+05 | 3.236  | 0.00121 | ** |
| future           | 6.262e-06  | 5.353e-05 | 4.087e+05 | 0.117  | 0.90688 |    |
| time_related     | -2.766e-05 | 5.360e-05 | 4.087e+05 | -0.516 | 0.60580 |    |
| questions        | -1.718e-04 | 7.261e-05 | 4.086e+05 | -2.367 | 0.01795 | *  |
| secret           | 8.761e-05  | 5.061e-05 | 4.086e+05 | 1.731  | 0.08343 | .  |
| curious          | -1.716e-04 | 8.504e-05 | 4.087e+05 | -2.017 | 0.04365 | *  |
| instructional    | 5.401e-05  | 6.752e-05 | 4.086e+05 | 0.800  | 0.42374 |    |
| second_person    | -4.706e-06 | 5.292e-05 | 4.086e+05 | -0.089 | 0.92914 |    |
| women            | 7.121e-05  | 5.411e-05 | 4.087e+05 | 1.316  | 0.18820 |    |
| men              | 5.888e-05  | 5.305e-05 | 4.087e+05 | 1.110  | 0.26705 |    |
| social_pl_fam    | -1.512e-05 | 6.668e-05 | 4.087e+05 | -0.227 | 0.82062 |    |
| social_pl_other  | -1.993e-05 | 7.290e-05 | 4.086e+05 | -0.273 | 0.78456 |    |
| authority        | 2.653e-05  | 1.153e-04 | 4.087e+05 | 0.230  | 0.81806 |    |
| fairness         | -5.717e-05 | 7.149e-05 | 4.086e+05 | -0.800 | 0.42391 |    |
| morality         | -3.388e-05 | 6.939e-05 | 4.087e+05 | -0.488 | 0.62535 |    |
| threat           | -1.163e-05 | 7.561e-05 | 4.087e+05 | -0.154 | 0.87773 |    |
| harm             | -3.778e-05 | 7.394e-05 | 4.087e+05 | -0.511 | 0.60942 |    |
| fearful          | 7.671e-05  | 8.429e-05 | 4.087e+05 | 0.910  | 0.36279 |    |
| safekeeping      | -8.681e-05 | 7.181e-05 | 4.088e+05 | -1.209 | 0.22672 |    |
| goals            | -7.550e-05 | 7.080e-05 | 4.087e+05 | -1.066 | 0.28625 |    |
| desire           | -5.977e-05 | 5.105e-05 | 4.086e+05 | -1.171 | 0.24170 |    |
| aesthetics       | -3.580e-05 | 5.058e-05 | 4.086e+05 | -0.708 | 0.47901 |    |
| visual_language  | 6.387e-05  | 7.118e-05 | 4.087e+05 | 0.897  | 0.36957 |    |
| auditory_lang    | 3.096e-05  | 6.130e-05 | 4.087e+05 | 0.505  | 0.61355 |    |
| cuteness         | -1.358e-05 | 5.072e-05 | 4.087e+05 | -0.268 | 0.78891 |    |



|                      |            |           |           |        |         |    |
|----------------------|------------|-----------|-----------|--------|---------|----|
| other_senses         | -1.066e-04 | 5.049e-05 | 4.087e+05 | -2.112 | 0.03472 | *  |
| pos_tone             | -1.888e-04 | 6.070e-05 | 4.087e+05 | -3.110 | 0.00187 | ** |
| neg_tone             | -2.898e-05 | 7.423e-05 | 4.087e+05 | -0.390 | 0.69621 |    |
| emotion_intensity    | 2.574e-04  | 1.038e-04 | 4.087e+05 | 2.481  | 0.01312 | *  |
| pos_emotion          | -7.949e-05 | 9.213e-05 | 4.087e+05 | -0.863 | 0.38830 |    |
| disgusting           | 5.044e-06  | 7.132e-05 | 4.088e+05 | 0.071  | 0.94362 |    |
| angry                | -5.593e-06 | 8.161e-05 | 4.086e+05 | -0.069 | 0.94536 |    |
| action_words         | 6.226e-05  | 5.242e-05 | 4.087e+05 | 1.188  | 0.23500 |    |
| verb_categories      | 2.463e-04  | 1.045e-04 | 4.087e+05 | 2.357  | 0.01841 | *  |
| conjunction          | 3.816e-05  | 5.469e-05 | 4.087e+05 | 0.698  | 0.48532 |    |
| physical_health      | -1.178e-04 | 6.095e-05 | 4.088e+05 | -1.933 | 0.05320 | .  |
| mental_health        | -4.752e-05 | 5.072e-05 | 4.086e+05 | -0.937 | 0.34889 |    |
| drugs                | -1.644e-05 | 5.067e-05 | 4.088e+05 | -0.324 | 0.74567 |    |
| financial            | -1.696e-04 | 8.509e-05 | 4.087e+05 | -1.993 | 0.04627 | *  |
| sex                  | 1.265e-04  | 7.230e-05 | 4.087e+05 | 1.750  | 0.08012 | .  |
| religion             | -2.601e-05 | 6.376e-05 | 4.087e+05 | -0.408 | 0.68328 |    |
| famous               | 1.516e-06  | 5.012e-05 | 4.086e+05 | 0.030  | 0.97587 |    |
| government_crime_std | -1.234e-04 | 5.557e-05 | 4.087e+05 | -2.221 | 0.02638 | *  |
| entertainment_std    | -2.012e-05 | 5.288e-05 | 4.087e+05 | -0.380 | 0.70358 |    |
| business_std         | 7.676e-06  | 5.247e-05 | 4.087e+05 | 0.146  | 0.88369 |    |
| education_std        | 7.382e-05  | 5.143e-05 | 4.087e+05 | 1.435  | 0.15117 |    |
| news_std             | 5.942e-05  | 5.046e-05 | 4.087e+05 | 1.177  | 0.23902 |    |
| identity_std         | 1.550e-05  | 5.072e-05 | 4.086e+05 | 0.306  | 0.75986 |    |
| hobby_std            | 6.745e-05  | 5.444e-05 | 4.087e+05 | 1.239  | 0.21538 |    |
| technology           | -1.104e-04 | 6.230e-05 | 4.086e+05 | -1.771 | 0.07650 | .  |

---

=====

## Model for: Angry

=====

Linear mixed model fit by maximum likelihood . t-tests use Satterthwaite's method  
['lmerModLmerTest']

Formula: formula

Data: data

| AIC        | BIC        | logLik   | deviance   | df.resid |
|------------|------------|----------|------------|----------|
| -1658903.4 | -1658149.8 | 829520.7 | -1659041.4 | 408974   |

Scaled residuals:

| Min     | 1Q     | Median | 3Q    | Max    |
|---------|--------|--------|-------|--------|
| -73.528 | -0.105 | -0.001 | 0.098 | 86.811 |

Random effects:

| Groups  | Name        | Variance  | Std.Dev.  | Corr |
|---------|-------------|-----------|-----------|------|
| host_id | (Intercept) | 4.604e-09 | 6.785e-05 |      |
|         | angry       | 5.253e-05 | 7.248e-03 | 1.00 |
|         | Residual    | 1.013e-03 | 3.183e-02 |      |

Number of obs: 409043, groups: host\_id, 389

Angry Highlighted

Fixed effects:

|              | Estimate  | Std. Error | df        | t     | value    | Pr(> t ) |
|--------------|-----------|------------|-----------|-------|----------|----------|
| (Intercept)  | 7.855e-06 | 5.060e-05  | 4.450e+02 | 0.155 | 0.876717 |          |
| angry        | 8.693e-04 | 5.508e-04  | 1.521e+02 | 1.578 | 0.116581 |          |
| reading_ease | 4.665e-04 | 7.067e-05  | 4.025e+05 | 6.601 | 4.09e-11 | ***      |
| common_words | 1.697e-04 | 9.616e-05  | 1.020e+05 | 1.765 | 0.077608 | .        |
| numeric      | 5.967e-05 | 5.334e-05  | 3.919e+05 | 1.119 | 0.263213 |          |
| concrete     | 8.142e-05 | 9.261e-05  | 3.840e+05 | 0.879 | 0.379369 |          |

|                  |            |           |           |        |          |     |
|------------------|------------|-----------|-----------|--------|----------|-----|
| swearing         | 5.121e-05  | 5.121e-05 | 3.871e+05 | 1.000  | 0.317277 |     |
| informality      | 9.860e-05  | 8.130e-05 | 3.900e+05 | 1.213  | 0.225173 |     |
| deliberation     | -2.522e-05 | 7.180e-05 | 3.893e+05 | -0.351 | 0.725389 |     |
| hedge            | -1.569e-05 | 5.113e-05 | 4.087e+05 | -0.307 | 0.758934 |     |
| negation         | -1.034e-04 | 5.350e-05 | 4.084e+05 | -1.934 | 0.053166 | .   |
| compare_contrast | 1.713e-04  | 9.569e-05 | 4.048e+05 | 1.790  | 0.073423 | .   |
| conflict         | -6.277e-05 | 7.257e-05 | 4.088e+05 | -0.865 | 0.387066 |     |
| location         | -4.672e-05 | 7.824e-05 | 3.510e+05 | -0.597 | 0.550407 |     |
| present          | 1.603e-04  | 6.235e-05 | 4.074e+05 | 2.570  | 0.010162 | *   |
| past             | 1.822e-04  | 5.466e-05 | 4.086e+05 | 3.334  | 0.000855 | *** |
| future           | 5.031e-06  | 5.363e-05 | 4.045e+05 | 0.094  | 0.925265 |     |
| time_related     | -3.674e-05 | 5.370e-05 | 4.062e+05 | -0.684 | 0.493840 |     |
| questions        | -1.646e-04 | 7.279e-05 | 3.850e+05 | -2.262 | 0.023724 | *   |
| secret           | 8.657e-05  | 5.072e-05 | 4.088e+05 | 1.707  | 0.087833 | .   |
| curious          | -1.630e-04 | 8.512e-05 | 3.939e+05 | -1.915 | 0.055433 | .   |
| instructional    | 5.880e-05  | 6.765e-05 | 4.086e+05 | 0.869  | 0.384711 |     |
| second_person    | -3.699e-06 | 5.303e-05 | 4.049e+05 | -0.070 | 0.944394 |     |
| women            | 6.811e-05  | 5.421e-05 | 4.090e+05 | 1.256  | 0.209014 |     |
| men              | 5.390e-05  | 5.313e-05 | 4.084e+05 | 1.015  | 0.310320 |     |
| social_pl_fam    | -1.178e-05 | 6.675e-05 | 4.089e+05 | -0.177 | 0.859895 |     |
| social_pl_other  | -1.722e-05 | 7.306e-05 | 4.064e+05 | -0.236 | 0.813701 |     |
| authority        | 3.358e-05  | 1.156e-04 | 2.854e+05 | 0.291  | 0.771362 |     |
| fairness         | -5.780e-05 | 7.165e-05 | 4.087e+05 | -0.807 | 0.419821 |     |
| morality         | -3.433e-05 | 6.953e-05 | 4.088e+05 | -0.494 | 0.621509 |     |
| threat           | 3.683e-06  | 7.575e-05 | 4.089e+05 | 0.049  | 0.961221 |     |
| harm             | -3.460e-05 | 7.404e-05 | 4.087e+05 | -0.467 | 0.640281 |     |
| fearful          | 6.900e-05  | 8.432e-05 | 4.079e+05 | 0.818  | 0.413148 |     |
| safekeeping      | -9.141e-05 | 7.193e-05 | 4.087e+05 | -1.271 | 0.203764 |     |
| goals            | -7.623e-05 | 7.093e-05 | 4.064e+05 | -1.075 | 0.282521 |     |

|                      |            |           |           |        |             |
|----------------------|------------|-----------|-----------|--------|-------------|
| desire               | -6.799e-05 | 5.117e-05 | 4.087e+05 | -1.329 | 0.183934    |
| aesthetics           | -3.341e-05 | 5.068e-05 | 4.089e+05 | -0.659 | 0.509657    |
| visual_language      | 6.905e-05  | 7.131e-05 | 4.089e+05 | 0.968  | 0.332894    |
| auditory_lang        | 3.669e-05  | 6.143e-05 | 4.084e+05 | 0.597  | 0.550306    |
| cuteness             | -1.251e-05 | 5.082e-05 | 4.088e+05 | -0.246 | 0.805602    |
| other_senses         | -1.047e-04 | 5.055e-05 | 4.089e+05 | -2.070 | 0.038417 *  |
| pos_tone             | -1.855e-04 | 6.082e-05 | 4.083e+05 | -3.051 | 0.002283 ** |
| neg_tone             | -3.585e-05 | 7.463e-05 | 4.040e+05 | -0.480 | 0.630997    |
| emotion_intensity    | 2.448e-04  | 1.040e-04 | 3.945e+05 | 2.353  | 0.018646 *  |
| pos_emotion          | -7.440e-05 | 9.230e-05 | 4.035e+05 | -0.806 | 0.420188    |
| neg_emotion          | 8.766e-05  | 7.639e-05 | 4.063e+05 | 1.148  | 0.251164    |
| disgusting           | 8.507e-06  | 7.140e-05 | 4.028e+05 | 0.119  | 0.905159    |
| action_words         | 6.163e-05  | 5.251e-05 | 4.088e+05 | 1.174  | 0.240548    |
| verb_categories      | 2.591e-04  | 1.047e-04 | 4.082e+05 | 2.475  | 0.013326 *  |
| conjunction          | 3.661e-05  | 5.478e-05 | 4.089e+05 | 0.668  | 0.503914    |
| physical_health      | -1.167e-04 | 6.106e-05 | 3.949e+05 | -1.911 | 0.056010 .  |
| mental_health        | -4.916e-05 | 5.076e-05 | 4.090e+05 | -0.968 | 0.332796    |
| drugs                | -1.543e-05 | 5.074e-05 | 4.085e+05 | -0.304 | 0.760967    |
| financial            | -1.726e-04 | 8.523e-05 | 4.025e+05 | -2.025 | 0.042912 *  |
| sex                  | 1.258e-04  | 7.250e-05 | 4.089e+05 | 1.735  | 0.082674 .  |
| religion             | -2.290e-05 | 6.391e-05 | 4.089e+05 | -0.358 | 0.720067    |
| famous               | 2.443e-06  | 5.021e-05 | 4.085e+05 | 0.049  | 0.961201    |
| government_crime_std | -1.159e-04 | 5.562e-05 | 4.086e+05 | -2.084 | 0.037138 *  |
| entertainment_std    | -1.295e-05 | 5.302e-05 | 3.814e+05 | -0.244 | 0.807018    |
| business_std         | 1.402e-06  | 5.256e-05 | 3.939e+05 | 0.027  | 0.978716    |
| education_std        | 6.767e-05  | 5.151e-05 | 4.083e+05 | 1.314  | 0.188884    |
| news_std             | 5.682e-05  | 5.056e-05 | 4.087e+05 | 1.124  | 0.261086    |
| identity_std         | 1.620e-05  | 5.080e-05 | 4.077e+05 | 0.319  | 0.749763    |
| hobby_std            | 6.434e-05  | 5.452e-05 | 4.075e+05 | 1.180  | 0.237940    |

technology -1.087e-04 6.241e-05 4.088e+05 -1.741 0.081654 .

---

Signif. codes: 0 '\*\*\*' 0.001 '\*\*' 0.01 '\*' 0.05 '.' 0.1 ' ' 1

### Model for: Disgusting

Linear mixed model fit by maximum likelihood . t-tests use Satterthwaite's method  
['lmerModLmerTest']

Formula: formula

Data: data

| AIC        | BIC        | logLik   | deviance   | df.resid |
|------------|------------|----------|------------|----------|
| -1658717.6 | -1657964.0 | 829427.8 | -1658855.6 | 408974   |

Scaled residuals:

| Min     | 1Q     | Median | 3Q    | Max    |
|---------|--------|--------|-------|--------|
| -74.329 | -0.105 | -0.001 | 0.097 | 86.742 |

Random effects:

| Groups   | Name        | Variance  | Std.Dev.  | Corr |
|----------|-------------|-----------|-----------|------|
| host_id  | (Intercept) | 0.000e+00 | 0.000e+00 |      |
|          | disgusting  | 1.471e-16 | 1.213e-08 | NaN  |
| Residual |             | 1.015e-03 | 3.185e-02 |      |

Number of obs: 409043, groups: host\_id, 389

Disgusting Highlighted

Fixed effects:

|             | Estimate   | Std. Error | df        | t value | Pr(> t ) |
|-------------|------------|------------|-----------|---------|----------|
| (Intercept) | -1.807e-06 | 4.980e-05  | 4.090e+05 | -0.036  | 0.971058 |

|                  |            |           |           |        |          |     |
|------------------|------------|-----------|-----------|--------|----------|-----|
| disgusting       | 6.634e-07  | 7.134e-05 | 4.090e+05 | 0.009  | 0.992581 |     |
| reading_ease     | 4.597e-04  | 7.057e-05 | 4.090e+05 | 6.514  | 7.34e-11 | *** |
| common_words     | 1.690e-04  | 9.499e-05 | 4.090e+05 | 1.780  | 0.075148 | .   |
| numeric          | 6.108e-05  | 5.328e-05 | 4.090e+05 | 1.146  | 0.251644 |     |
| concrete         | 8.827e-05  | 9.220e-05 | 4.090e+05 | 0.957  | 0.338366 |     |
| swearing         | 6.049e-05  | 5.096e-05 | 4.090e+05 | 1.187  | 0.235251 |     |
| informality      | 1.041e-04  | 8.124e-05 | 4.090e+05 | 1.282  | 0.199900 |     |
| deliberation     | -2.769e-05 | 7.174e-05 | 4.090e+05 | -0.386 | 0.699512 |     |
| hedge            | -1.571e-05 | 5.116e-05 | 4.090e+05 | -0.307 | 0.758819 |     |
| negation         | -1.028e-04 | 5.351e-05 | 4.090e+05 | -1.920 | 0.054831 | .   |
| compare_contrast | 1.602e-04  | 9.565e-05 | 4.090e+05 | 1.675  | 0.093918 | .   |
| conflict         | -6.473e-05 | 7.259e-05 | 4.090e+05 | -0.892 | 0.372566 |     |
| location         | -4.536e-05 | 7.809e-05 | 4.090e+05 | -0.581 | 0.561339 |     |
| present          | 1.601e-04  | 6.236e-05 | 4.090e+05 | 2.567  | 0.010256 | *   |
| past             | 1.799e-04  | 5.467e-05 | 4.090e+05 | 3.292  | 0.000996 | *** |
| future           | 4.116e-06  | 5.365e-05 | 4.090e+05 | 0.077  | 0.938845 |     |
| time_related     | -3.934e-05 | 5.368e-05 | 4.090e+05 | -0.733 | 0.463599 |     |
| questions        | -1.663e-04 | 7.276e-05 | 4.090e+05 | -2.286 | 0.022280 | *   |
| secret           | 8.769e-05  | 5.075e-05 | 4.090e+05 | 1.728  | 0.083987 | .   |
| curious          | -1.708e-04 | 8.503e-05 | 4.090e+05 | -2.009 | 0.044565 | *   |
| instructional    | 5.918e-05  | 6.769e-05 | 4.090e+05 | 0.874  | 0.382006 |     |
| second_person    | -4.166e-06 | 5.305e-05 | 4.090e+05 | -0.079 | 0.937403 |     |
| women            | 7.032e-05  | 5.420e-05 | 4.090e+05 | 1.297  | 0.194476 |     |
| men              | 5.536e-05  | 5.313e-05 | 4.090e+05 | 1.042  | 0.297369 |     |
| social_pl_fam    | -1.505e-05 | 6.677e-05 | 4.090e+05 | -0.225 | 0.821708 |     |
| social_pl_other  | -1.621e-05 | 7.308e-05 | 4.090e+05 | -0.222 | 0.824422 |     |
| authority        | 3.068e-05  | 1.151e-04 | 4.090e+05 | 0.266  | 0.789862 |     |
| fairness         | -5.878e-05 | 7.169e-05 | 4.090e+05 | -0.820 | 0.412272 |     |
| morality         | -3.310e-05 | 6.953e-05 | 4.090e+05 | -0.476 | 0.634045 |     |

|                      |            |           |           |        |          |    |
|----------------------|------------|-----------|-----------|--------|----------|----|
| threat               | 3.266e-06  | 7.574e-05 | 4.090e+05 | 0.043  | 0.965609 |    |
| harm                 | -3.947e-05 | 7.391e-05 | 4.090e+05 | -0.534 | 0.593266 |    |
| fearful              | 6.674e-05  | 8.430e-05 | 4.090e+05 | 0.792  | 0.428578 |    |
| safekeeping          | -9.182e-05 | 7.196e-05 | 4.090e+05 | -1.276 | 0.201958 |    |
| goals                | -7.741e-05 | 7.096e-05 | 4.090e+05 | -1.091 | 0.275288 |    |
| desire               | -6.687e-05 | 5.118e-05 | 4.090e+05 | -1.306 | 0.191384 |    |
| aesthetics           | -3.354e-05 | 5.071e-05 | 4.090e+05 | -0.661 | 0.508303 |    |
| visual_language      | 6.407e-05  | 7.132e-05 | 4.090e+05 | 0.898  | 0.368983 |    |
| auditory_lang        | 3.643e-05  | 6.145e-05 | 4.090e+05 | 0.593  | 0.553276 |    |
| cuteness             | -1.286e-05 | 5.084e-05 | 4.090e+05 | -0.253 | 0.800316 |    |
| other_senses         | -1.036e-04 | 5.057e-05 | 4.090e+05 | -2.048 | 0.040574 | *  |
| pos_tone             | -1.870e-04 | 6.083e-05 | 4.090e+05 | -3.074 | 0.002110 | ** |
| neg_tone             | -3.098e-05 | 7.433e-05 | 4.090e+05 | -0.417 | 0.676809 |    |
| emotion_intensity    | 2.448e-04  | 1.038e-04 | 4.090e+05 | 2.357  | 0.018403 | *  |
| pos_emotion          | -7.027e-05 | 9.229e-05 | 4.090e+05 | -0.761 | 0.446422 |    |
| neg_emotion          | 9.290e-05  | 7.637e-05 | 4.090e+05 | 1.216  | 0.223808 |    |
| angry                | -2.275e-06 | 8.168e-05 | 4.090e+05 | -0.028 | 0.977782 |    |
| action_words         | 6.090e-05  | 5.253e-05 | 4.090e+05 | 1.159  | 0.246346 |    |
| verb_categories      | 2.595e-04  | 1.047e-04 | 4.090e+05 | 2.478  | 0.013220 | *  |
| conjunction          | 3.900e-05  | 5.479e-05 | 4.090e+05 | 0.712  | 0.476505 |    |
| physical_health      | -1.160e-04 | 6.105e-05 | 4.090e+05 | -1.900 | 0.057410 | .  |
| mental_health        | -5.006e-05 | 5.078e-05 | 4.090e+05 | -0.986 | 0.324207 |    |
| drugs                | -1.579e-05 | 5.075e-05 | 4.090e+05 | -0.311 | 0.755787 |    |
| financial            | -1.709e-04 | 8.524e-05 | 4.090e+05 | -2.006 | 0.044901 | *  |
| sex                  | 1.259e-04  | 7.248e-05 | 4.090e+05 | 1.738  | 0.082264 | .  |
| religion             | -2.379e-05 | 6.392e-05 | 4.090e+05 | -0.372 | 0.709710 |    |
| famous               | 1.299e-06  | 5.024e-05 | 4.090e+05 | 0.026  | 0.979367 |    |
| government_crime_std | -1.140e-04 | 5.562e-05 | 4.090e+05 | -2.050 | 0.040325 | *  |
| entertainment_std    | -1.404e-05 | 5.299e-05 | 4.090e+05 | -0.265 | 0.791079 |    |

```

business_std      1.282e-06  5.255e-05  4.090e+05  0.024 0.980543
education_std     6.487e-05  5.153e-05  4.090e+05  1.259 0.208059
news_std          5.740e-05  5.058e-05  4.090e+05  1.135 0.256429
identity_std      1.565e-05  5.082e-05  4.090e+05  0.308 0.758107
hobby_std         6.095e-05  5.453e-05  4.090e+05  1.118 0.263692
technology        -1.083e-04  6.242e-05  4.090e+05  -1.736 0.082635 .

```

---

Signif. codes: 0 '\*\*\*' 0.001 '\*\*' 0.01 '\*' 0.05 '.' 0.1 ' ' 1

## Study 1

### PANAS

| Predictor               | Coefficient | Std. Err. | t     | p-value | 95% CI (Lower) | 95% CI (Upper) |
|-------------------------|-------------|-----------|-------|---------|----------------|----------------|
| neg_emotion             | -0.028      | 0.217     | -0.13 | 0.898   | -0.454         | 0.398          |
| neg_tone                | 0.484       | 0.217     | 2.23  | 0.026   | 0.059          | 0.909          |
| panas_pos               | 0.325       | 0.044     | 7.32  | 0.000   | 0.239          | 0.412          |
| panas_neg               | 0.100       | 0.062     | 1.62  | 0.104   | -0.021         | 0.222          |
| panas_pos x neg_emotion | -0.016      | 0.052     | -0.31 | 0.754   | -0.119         | 0.086          |
| panas_pos x neg_tone    | -0.047      | 0.052     | -0.90 | 0.368   | -0.149         | 0.055          |
| panas_neg x neg_emotion | 0.098       | 0.071     | 1.37  | 0.170   | -0.042         | 0.237          |
| panas_neg x neg_tone    | -0.033      | 0.071     | -0.47 | 0.638   | -0.173         | 0.106          |
| Intercept               | 1.726       | 0.186     | 9.24  | 0.000   | 1.359          | 2.092          |

### Model Statistics

$R^2 = 0.0785$

Adj.  $R^2 = 0.0749$

$F(8, 2068) = 22.02$

$p(\text{model}) < 0.0001$

Root MSE = 1.0611



## Trait Neuroticism

| Predictor           | Coefficient | Std. Err. | t     | p-value | 95% CI (Lower) | 95% CI (Upper) |
|---------------------|-------------|-----------|-------|---------|----------------|----------------|
| neg_emotion         | -0.039      | 0.221     | -0.18 | 0.860   | -0.471         | 0.394          |
| neg_tone            | 0.245       | 0.221     | 1.11  | 0.267   | -0.188         | 0.677          |
| neuro_combined      | -0.089      | 0.038     | -2.36 | 0.018   | -0.163         | -0.015         |
| neuro x neg_emotion | 0.017       | 0.044     | 0.39  | 0.693   | -0.068         | 0.104          |
| neuro x neg_tone    | 0.013       | 0.044     | 0.29  | 0.775   | -0.073         | 0.099          |
| Intercept           | 3.320       | 0.190     | 17.52 | 0.000   | 2.949          | 3.692          |

## Model Statistics

**R<sup>2</sup> = 0.0253**

**Adj. R<sup>2</sup> = 0.0229**

**F(5, 2071) = 10.74**

**p (model) < 0.0001**

**Root MSE = 1.0905**

## Lay Rationalism

| Predictor                        | Coefficient | Std. Err. | t     | p-value | 95% CI (Lower) | 95% CI (Upper) |
|----------------------------------|-------------|-----------|-------|---------|----------------|----------------|
| neg_emotion                      | -0.062      | 0.285     | -0.22 | 0.829   | -0.621         | 0.498          |
| neg_tone                         | 0.369       | 0.286     | 1.29  | 0.197   | -0.192         | 0.929          |
| lay_rationalism                  | 0.071       | 0.064     | 1.11  | 0.268   | -0.054         | 0.196          |
| lay_rationalism ×<br>neg_emotion | 0.030       | 0.078     | 0.38  | 0.701   | -0.123         | 0.183          |
| lay_rationalism ×<br>neg_tone    | -0.017      | 0.078     | -0.22 | 0.826   | -0.170         | 0.136          |
| Intercept                        | 2.626       | 0.236     | 11.15 | 0.000   | 2.164          | 3.088          |

## Model Statistics

**R<sup>2</sup>** = 0.0218

**Adj. R<sup>2</sup>** = 0.0194

**F(5, 2071)** = 9.22

**p (model)** < 0.0001

**Root MSE** = 1.0924

## Study 2

### Manipulated Site Label

| Predictor                 | Coefficient | Std. Err. | t     | p-value | 95% CI (Lower) | 95% CI (Upper) |
|---------------------------|-------------|-----------|-------|---------|----------------|----------------|
| neg_tone                  | -0.003      | 0.041     | -0.08 | 0.933   | -0.084         | 0.077          |
| credibility               | 0.387       | 0.096     | 4.05  | 0.000   | 0.199          | 0.574          |
| neg_tone x credibility    | -0.047      | 0.055     | -0.85 | 0.397   | -0.154         | 0.061          |
| neg_emotion               | -0.078      | 0.040     | -1.92 | 0.056   | -0.157         | 0.001          |
| neg_emotion x credibility | 0.104       | 0.058     | 1.80  | 0.072   | -0.009         | 0.218          |
| headline_type = 2         | -0.018      | 0.098     | -0.18 | 0.855   | -0.208         | 0.173          |
| headline_type = 3         | 0.101       | 0.109     | 0.92  | 0.356   | -0.115         | 0.315          |
| headline_type = 4         | 0.273       | 0.110     | 2.48  | 0.013   | 0.057          | 0.489          |
| Intercept                 | 2.939       | 0.096     | 30.89 | 0.000   | 2.752          | 3.126          |

### Model Statistics

$R^2 = 0.0358$

$F(8, 430) = 5.02$

$p(\text{model}) < 0.0001$

Root MSE = 1.2968

## Manipulated Reader Goal

| Predictor                 | Coefficient | Std. Err. | t     | p-value | 95% CI (Lower) | 95% CI (Upper) |
|---------------------------|-------------|-----------|-------|---------|----------------|----------------|
| neg_tone                  | -0.048      | 0.043     | -1.10 | 0.270   | -0.134         | 0.037          |
| credibility               | 0.595       | 0.094     | 6.28  | 0.000   | 0.409          | 0.781          |
| neg_tone x credibility    | -0.297      | 0.066     | -4.49 | 0.000   | -0.428         | -0.167         |
| neg_emotion               | -0.101      | 0.048     | -2.11 | 0.035   | -0.196         | -0.007         |
| neg_emotion x credibility | -0.149      | 0.065     | -2.27 | 0.024   | -0.278         | -0.020         |
| headline_type = 2         | 0.054       | 0.086     | 0.62  | 0.533   | -0.116         | 0.224          |
| headline_type = 3         | 0.039       | 0.114     | 0.34  | 0.733   | -0.186         | 0.264          |
| headline_type = 4         | 0.288       | 0.110     | 2.61  | 0.009   | 0.071          | 0.505          |
| Intercept                 | 2.927       | 0.092     | 31.94 | 0.000   | 2.747          | 3.107          |

## Model Statistics

**R<sup>2</sup> = 0.0417**

**F(8, 402) = 13.46**

**p (model) < 0.0001**

**Root MSE = 1.3162**

Measured Site Preference

| Predictor                             | Coefficient | Std. Err. | t     | p-value | 95% CI (Lower) | 95% CI (Upper) |
|---------------------------------------|-------------|-----------|-------|---------|----------------|----------------|
| neg_tone                              | 0.066       | 0.055     | 1.20  | 0.231   | -0.042         | 0.173          |
| credibility_measured                  | 0.664       | 0.107     | 6.19  | 0.000   | 0.452          | 0.874          |
| neg_tone x<br>credibility_measured    | -0.352      | 0.066     | -5.36 | 0.000   | -0.482         | -0.223         |
| neg_emotion                           | -0.022      | 0.056     | -0.39 | 0.693   | -0.131         | 0.087          |
| neg_emotion x<br>credibility_measured | -0.257      | 0.066     | -3.87 | 0.000   | -0.388         | -0.127         |
| headline_type = 2                     | -0.274      | 0.069     | -4.00 | 0.000   | -0.409         | -0.139         |
| headline_type = 3                     | -0.013      | 0.090     | -0.14 | 0.890   | -0.190         | 0.165          |
| headline_type = 4                     | -0.136      | 0.093     | -1.47 | 0.141   | -0.317         | 0.046          |
| Intercept                             | 3.146       | 0.109     | 28.97 | 0.000   | 2.933          | 3.359          |

Model Statistics

**R<sup>2</sup> = 0.0411**  
**F(8, 481) = 19.80**  
**p (model) < 0.0001**  
**Root MSE = 1.2445**

## Measured Reader Goal

| Predictor                             | Coefficient | Std. Err. | t     | p-value | 95% CI (Lower) | 95% CI (Upper) |
|---------------------------------------|-------------|-----------|-------|---------|----------------|----------------|
| neg_tone                              | 0.020       | 0.070     | 0.29  | 0.770   | -0.117         | 0.157          |
| credibility_measured                  | 0.629       | 0.118     | 5.35  | 0.000   | 0.398          | 0.860          |
| neg_tone ×<br>credibility_measured    | -0.269      | 0.079     | -3.42 | 0.001   | -0.425         | -0.115         |
| neg_emotion                           | 0.032       | 0.059     | 0.55  | 0.582   | -0.083         | 0.146          |
| neg_emotion ×<br>credibility_measured | -0.272      | 0.067     | -4.09 | 0.000   | -0.403         | -0.141         |
| headline_type = 2                     | -0.229      | 0.067     | -3.39 | 0.001   | -0.362         | -0.096         |
| headline_type = 3                     | -0.093      | 0.092     | -1.01 | 0.312   | -0.273         | 0.087          |
| headline_type = 4                     | -0.155      | 0.094     | -1.66 | 0.098   | -0.338         | 0.029          |
| Intercept                             | 3.100       | 0.120     | 25.89 | 0.000   | 2.865          | 3.336          |

## Model Statistics

**R<sup>2</sup> = 0.0319**

**F(8, 473) = 16.38**

**p (model) < 0.0001**

**Root MSE = 1.2454**

## Study 3

### Regression combining all three conditions

| Predictor                             | Coefficient | Std. Err. | t     | p-value | 95% CI (Lower) | 95% CI (Upper) |
|---------------------------------------|-------------|-----------|-------|---------|----------------|----------------|
| neg_tone                              | -0.047      | 0.031     | -1.52 | 0.130   | -0.107         | 0.014          |
| credibility_combined                  | 0.778       | 0.058     | 13.47 | 0.000   | 0.665          | 0.892          |
| neg_tone ×<br>credibility_combined    | -0.218      | 0.039     | -5.61 | 0.000   | -0.294         | -0.141         |
| neg_emotion                           | 0.021       | 0.032     | 0.66  | 0.513   | -0.043         | 0.085          |
| neg_emotion ×<br>credibility_combined | -0.203      | 0.039     | -5.26 | 0.000   | -0.280         | -0.128         |
| headline_type = 2                     | -0.245      | 0.044     | -5.51 | 0.000   | -0.331         | -0.157         |
| headline_type = 3                     | 0.028       | 0.057     | 0.50  | 0.615   | -0.082         | 0.138          |
| headline_type = 4                     | -0.017      | 0.058     | -0.29 | 0.773   | -0.130         | 0.097          |
| Intercept                             | 2.968       | 0.060     | 49.20 | 0.000   | 2.850          | 3.087          |

### Model Statistics

**R<sup>2</sup> = 0.0572**

**F(8, 1341) = 48.62**

**p (model) < 0.0001**

**Root MSE = 1.2677**

### Moderated Mediation

To test whether the effect of negative tone on reading likelihood is mediated by inferences of manipulative intent (IMI), and whether this indirect effect varies depending on reader goals, we estimated a moderated mediation model corresponding to Hayes' PROCESS Model 3. In this model, negative tone serves as the independent variable, IMI is the mediator, and likelihood to read is the dependent variable. Crucially, credibility goal

(dummy-coded, with low credibility = 0 representing an enjoyment goal and high credibility = 1 representing a credibility goal) moderates the second stage of the mediation—the path from IMI to likelihood.

## Manipulated Reader Goal

### Negative Tone

| Condition                | Coefficient | Std. Err. | z     | p-value | 95% CI (Lower) | 95% CI (Upper) |
|--------------------------|-------------|-----------|-------|---------|----------------|----------------|
| Enjoyment Goal (_bs_1)   | 0.0045      | 0.0465    | 0.10  | 0.922   | -0.0867        | 0.0958         |
| Credibility Goal (_bs_2) | -0.1197     | 0.0322    | -3.71 | 0.000   | -0.1829        | -0.0566        |

### Negative Emotion

| Condition                | Coefficient | Std. Err. | z     | p-value | 95% CI (Lower) | 95% CI (Upper) |
|--------------------------|-------------|-----------|-------|---------|----------------|----------------|
| Enjoyment Goal (_bs_1)   | 0.0002      | 0.0457    | 0.00  | 0.996   | -0.0893        | 0.0897         |
| Credibility Goal (_bs_2) | -0.1171     | 0.0307    | -3.81 | 0.000   | -0.1773        | -0.0569        |

## Measured Site Preference

### Negative Tone

| Condition                | Coefficient | Std. Err. | z     | p-value | 95% CI (Lower) | 95% CI (Upper) |
|--------------------------|-------------|-----------|-------|---------|----------------|----------------|
| Enjoyment Goal (_bs_1)   | 0.1257      | 0.0457    | 2.75  | 0.006   | 0.0362         | 0.2153         |
| Credibility Goal (_bs_2) | -0.0988     | 0.0248    | -3.98 | 0.000   | -0.1474        | -0.0501        |

### Negative Emotion



| Condition                | Coefficient | Std. Err. | z     | p-value | 95% CI (Lower) | 95% CI (Upper) |
|--------------------------|-------------|-----------|-------|---------|----------------|----------------|
| Enjoyment Goal (_bs_1)   | 0.1216      | 0.0442    | 2.75  | 0.006   | 0.0349         | 0.2083         |
| Credibility Goal (_bs_2) | -0.1077     | 0.0250    | -4.30 | 0.000   | -0.1568        | -0.0586        |

## Measured Reader Goal

### Negative Tone

| Condition                | Coefficient | Std. Err. | z     | p-value | 95% CI (Lower) | 95% CI (Upper) |
|--------------------------|-------------|-----------|-------|---------|----------------|----------------|
| Enjoyment Goal (_bs_1)   | 0.0881      | 0.0428    | 2.06  | 0.040   | 0.0042         | 0.1719         |
| Credibility Goal (_bs_2) | -0.1000     | 0.0265    | -3.77 | 0.000   | -0.1519        | -0.0481        |

### Negative Emotion

| Condition                | Coefficient | Std. Err. | z     | p-value | 95% CI (Lower) | 95% CI (Upper) |
|--------------------------|-------------|-----------|-------|---------|----------------|----------------|
| Enjoyment Goal (_bs_1)   | 0.0785      | 0.0402    | 1.96  | 0.051   | -0.0002        | 0.1573         |
| Credibility Goal (_bs_2) | -0.1028     | 0.0252    | -4.07 | 0.000   | -0.1522        | -0.0533        |

## Study 4

| Predictor                          | Coef.   | Std. Err. | t     | p     | 95% CI (Lower) | 95% CI (Upper) |
|------------------------------------|---------|-----------|-------|-------|----------------|----------------|
| Negative Tone                      | 0.0297  | 0.0381    | 0.78  | 0.436 | −0.0451        | 0.1045         |
| Credibility (Combined)             | 0.7560  | 0.0958    | 7.89  | <.001 | 0.5680         | 0.9442         |
| Neg Tone × Credibility             | −0.1436 | 0.0480    | −2.99 | 0.003 | −0.2378        | −0.0493        |
| Negative Emotion                   | −0.0438 | 0.0401    | −1.09 | 0.275 | −0.1225        | 0.0349         |
| Neg Emotion × Credibility          | −0.1373 | 0.0510    | −2.69 | 0.007 | −0.2375        | −0.0371        |
| Headline Type (2)                  | 0.2353  | 0.0411    | 5.73  | <.001 | 0.1546         | 0.3159         |
| Condition (3: Measured Mindset)    | 0.2199  | 0.0994    | 2.21  | 0.027 | 0.0246         | 0.4152         |
| Condition (4: Manipulated Mindset) | 0.2575  | 0.0965    | 2.68  | 0.008 | 0.0689         | 0.4462         |
| Intercept                          | 2.5714  | 0.1028    | 25.00 | <.001 | 2.3695         | 2.7734         |

## Model Statistics

$$R^2 = 0.0779$$

$$F(8, 593) = 19.33$$

$$p(\text{model}) < .0001$$

$$\text{Root MSE} = 1.2444$$

## Study 5

### Affective Polarization

| Predictor                 | Coef.   | Std. Err. | t     | p     | 95% CI (Lower) | 95% CI (Upper) |
|---------------------------|---------|-----------|-------|-------|----------------|----------------|
| Negative Tone             | 0.6740  | 0.4332    | 1.56  | 0.120 | −0.1758        | 1.5238         |
| Credibility (Measured)    | 0.8516  | 0.4293    | 1.98  | 0.047 | 0.0094         | 1.6938         |
| Neg Tone × Credibility    | −1.1205 | 0.4793    | −2.34 | 0.020 | −2.0607        | −0.1803        |
| Negative Emotion          | 1.1489  | 0.4343    | 2.65  | 0.008 | 0.2970         | 2.0007         |
| Neg Emotion × Credibility | −0.5021 | 0.4802    | −1.05 | 0.296 | −1.4441        | 0.4399         |
| Party (1 = Democrat)      | 1.1284  | 0.1869    | 6.04  | <.001 | 0.7617         | 1.4952         |
| Intercept                 | 2.1948  | 0.3992    | 5.50  | <.001 | 1.4118         | 2.9777         |

## Model Statistics

$R^2 = 0.0392$

$F(6, 1480) = 9.94$

$p(\text{model}) < .0001$

Root MSE = 3.564

## Feelings Towards In-Group

| Predictor                 | Coef.   | Std. Err. | t     | p     | 95% CI (Lower) | 95% CI (Upper) |
|---------------------------|---------|-----------|-------|-------|----------------|----------------|
| Negative Tone             | 0.0448  | 0.3240    | 0.14  | 0.890 | −0.5908        | 0.6803         |
| Credibility (Measured)    | 0.7493  | 0.3219    | 2.33  | 0.020 | 0.1178         | 1.3807         |
| Neg Tone × Credibility    | −0.6268 | 0.3558    | −1.76 | 0.078 | −1.3247        | 0.0711         |
| Negative Emotion          | 0.6877  | 0.3290    | 2.10  | 0.036 | 0.0441         | 1.3313         |
| Neg Emotion × Credibility | −0.4778 | 0.3597    | −1.33 | 0.184 | −1.1833        | 0.2277         |
| Party (1 = Democrat)      | −0.4658 | 0.1354    | −3.44 | 0.001 | −0.7314        | −0.2003        |
| Intercept                 | 5.9819  | 0.2994    | 19.98 | <.001 | 5.3947         | 6.5691         |

## Model Statistics

$R^2 = 0.0224$

$F(6, 1480) = 5.55$

$p(\text{model}) < .0001$

Root MSE = 2.5866

## Feelings Towards Out-Group

| Predictor                 | Coef.   | Std. Err. | t      | p     | 95% CI (Lower) | 95% CI (Upper) |
|---------------------------|---------|-----------|--------|-------|----------------|----------------|
| Negative Tone             | −0.6293 | 0.2899    | −2.17  | 0.030 | −1.1979        | −0.0606        |
| Credibility (Measured)    | −0.1024 | 0.2963    | −0.35  | 0.730 | −0.6837        | 0.4789         |
| Neg Tone × Credibility    | 0.4937  | 0.3229    | 1.53   | 0.127 | −0.1398        | 1.1272         |
| Negative Emotion          | −0.4611 | 0.2931    | −1.57  | 0.116 | −1.0361        | 0.1139         |
| Neg Emotion × Credibility | 0.0243  | 0.3259    | 0.07   | 0.940 | −0.6150        | 0.6636         |
| Party (1 = Democrat)      | −1.5943 | 0.1283    | −12.42 | <.001 | −1.8460        | −1.3425        |
| Intercept                 | 3.7871  | 0.2757    | 13.73  | <.001 | 3.2463         | 4.3280         |

## Model Statistics

$$R^2 = 0.1038$$

$$F(6, 1480) = 30.06$$

$$p(\text{model}) < .0001$$

$$\text{Root MSE} = 2.4585$$

## Extra Studies

### Identifying Relevant Site Level Characteristics/Goals

#### Methods

To identify which site-level characteristics and reader goals are most psychologically salient to readers, we conducted a preregistered sorting task with 400 participants on Prolific. Participants were shown a list of news platforms, some of which were self-generated and others selected from a predefined list, and were asked to organize these platforms into meaningful groups based on their own judgments of similarity.

For each group they created, participants were prompted to respond to three open-ended questions:

- “Name this group of sites”
- “What do these sites have in common?”
- “What is your mindset or goal when reading news from this group?”

All responses were written in open-ended text fields—no rating scales or structured categories were provided. This open-ended format allowed participants to freely describe both emergent categories of site-level attributes (e.g., what defines a cluster of platforms) and the reader goals or mindsets they typically adopt when consuming content from those clusters.

To complement and validate these human-coded responses, we also conducted a parallel analysis using large-scale headline data. Specifically, we extracted 100 headlines per host (news source) from the Chartbeat dataset and input these into GPT-4o, a state-of-the-art large language model. We then prompted the model to classify the hosts into clusters based on tone, structure, and content. The exact prompt read:

“Below are headline samples from many different news platforms. Each block represents a different host (news source). Please group these hosts into 3–5 clusters based on tone, structure, and content focus of their headlines. For each cluster, describe the shared style or characteristics, and include a few example Host IDs that belong to that cluster.”

This LLM-based approach offered a scalable and systematic way to identify psychologically meaningful distinctions among news sources at the site level, based on language use alone.

## Results

While the open-ended task yielded rich qualitative responses, a substantial portion lacked specificity. In particular, 65% of responses describing what the grouped sites had in common were too vague or generic to code meaningfully (e.g., “News,” “I get notifications from them”). However, among the remaining responses, participants’ descriptions clustered clearly and consistently into four interpretable categories:

1. Credible news sites – Platforms described as trustworthy, fact-based, or objective.
2. Enjoyable news sites – Sites that participants found entertaining, lighthearted, or easy to engage with.
3. Politically focused outlets – Platforms associated with ideological content or political commentary.
4. Sites defined by geographic relevance – Typically grouped as *local* vs. *non-local* news sources.

Responses to the question about reader mindset or goal were even sparser in terms of specificity: only 16% of participants provided responses that clearly referenced a psychological goal. However, of those, nearly all mentioned either seeking credibility (e.g., “I go here to get facts”) or seeking enjoyment (e.g., “I read these to pass the time or be entertained”).

The clusters generated by GPT-4o using headline language closely mirrored these categories. The LLM grouped hosts into categories such as:

- “Serious and trustworthy” – aligned with the credibility-focused cluster,
- “Lighthearted and entertaining” – mirroring the enjoyment-oriented group,
- “Political and issue-focused” – consistent with the ideologically defined category,
- “Locally grounded” – reflecting geographical relevance.

This convergence between the more interpretable subset of human-coded responses and the unsupervised GPT-based classification of headline tone and content lent strong support to our theoretical framework. Together, these two approaches suggest that credibility and enjoyment are not only prevalent site-level attributes, but also psychologically meaningful dimensions that shape how readers mentally organize and engage with online news platforms.

## Credibility - Enjoyment Framework - Anger

### Methods

This study followed the same basic procedure as Study 2 but focused specifically on the manipulation of **anger**. Participants were exposed to a total of **8 headlines**, each derived from one of **4 core topics**, with **two versions per topic**: a high-anger version and a low-anger version. Each participant viewed **4 headlines**, including **2 high-anger** and **2 low-anger** headlines, randomly selected.

### Stimuli

#### Set 1:

- *City Council Blasted for Gutting Transit Services and Ignoring Public Outcry*
- *Federal Lawmakers Approve Changes to National Healthcare Policy Impacting Millions*
- *Parents Furious Over School's Inexcusable Delay in Promised Playground Project*
- *Airlines Increase Luggage Fees Ahead of Busy Travel Season*

#### Set 2:

- *City Council Announces Changes to Transit Budget, Impacting Some Local Routes*
- *Outrage Grows as Lawmakers Strip Critical Healthcare Protections from Millions*
- *School Postpones Playground Construction, Plans Still Under Review*
- *Upset Passengers Fume as Airlines Hike Baggage Fees Without Warning*

### Results

Across all three conditions—Manipulated Reader Goal, Measured Site Preference, and Measured Reader Goal—we observed a significant interaction between anger and credibility. That is, the effect of anger on headline click likelihood was moderated by whether the platform or reader context emphasized credibility. See the table below for full model results.

| Predictor                          | Coefficient | Std. Error | t     | p     | 95% CI (Lower) | 95% CI (Upper) |
|------------------------------------|-------------|------------|-------|-------|----------------|----------------|
| Angry (1)                          | 0.3889      | 0.0853     | 4.56  | 0.000 | 0.2213         | 0.5651         |
| Credibility Combined (1)           | 1.0382      | 0.1028     | 10.10 | 0.000 | 0.8362         | 1.2402         |
| Angry × Credibility Combined (1×1) | −0.5836     | 0.1094     | −5.33 | 0.000 | −0.7985        | −0.3688        |
| Intercept                          | 2.3500      | 0.0867     | 27.10 | 0.000 | 2.1797         | 2.5203         |
